# Supplementary material for: Get a grip—evolution of claw shape in relation to microhabitat use in intertidal arthropods (Acari, Oribatida)
Source: PeerJ. 2020 Feb 13;8:e8488. doi: 10.7717/peerj.8488 (PMC7024575; doi:10.7717/peerj.8488)
Supplement: Supplemental Information 1 [file peerj-08-8488-s001.xlsx]

## Sheet: Tabelle1
	Id	Species	Species Short	Habitat	Microhabitat	Mh Short	Body length	Diameter Claw	Id LM Analysis	X LM1	Y LM1	X LM2	Y LM2	X LM3	Y LM3	X LM4	Y LM4	X LM5	Y LM5	X LM6	Y LM6	X LM7	Y LM7	X LM8	Y LM8	X LM9	Y LM9	X LM10	Y LM10	X LM11	Y LM11	X LM12	Y LM12	X LM13	Y LM13	X LM14	Y LM14	X LM15	Y LM15	X LM16	Y LM16	X LM17	Y LM17	X LM18	Y LM18	X LM19	Y LM19	X LM20	Y LM20
1	149_agal	Alismobates galapagoensis	agal	littoral	mix	mi	346	29.6	149_agal_mi	218.904	206.027	215.89	203.835	201.369	229.863	216.438	207.123	213.424	207.123	210.41	207.397	207.671	207.671	204.657	207.945	201.917	208.493	199.178	209.863	197.26	211.78	195.616	214.52	194.794	217.26	195.068	220	196.164	222.739	197.534	225.205	199.452	227.397	212.602	204.109	209.315	204.109	205.753	203.835
2	150_agal	Alismobates galapagoensis	agal	littoral	mix	mi	361	36.7	150_agal_mi	305.753	129.041	307.123	133.424	342.191	129.589	309.314	129.589	312.328	130.685	315.068	132.602	316.986	135.068	319.177	137.534	321.369	140	324.109	141.917	327.123	143.013	330.41	143.561	333.698	142.739	336.438	140.822	338.629	138.63	340.547	135.89	341.643	132.876	310.41	134.52	312.602	137.26	314.52	140.548
3	151_agal	Alismobates galapagoensis	agal	littoral	mix	mi	345	34	151_agal_mi	225.479	161.917	223.287	158.082	195.068	176.164	222.465	162.191	219.452	162.191	216.712	161.096	213.972	160.548	211.232	159.452	208.219	158.63	205.479	158.356	202.465	158.63	199.726	159.452	197.534	161.37	195.89	163.835	195.342	166.849	195.068	169.589	195.068	172.602	220.273	158.356	217.26	156.986	214.246	155.342
4	152_agal	Alismobates galapagoensis	agal	littoral	mix	mi	364	32	152_agal_mi	244.931	187.671	246.575	183.013	214.794	177.808	242.739	186.301	240.821	184.109	239.452	181.643	238.082	178.904	237.26	176.164	236.164	173.698	234.246	171.506	232.054	169.589	229.041	168.767	226.301	168.493	223.561	169.315	221.095	170.959	218.904	172.602	216.986	175.068	243.835	181.095	243.013	177.808	242.191	174.52
5	153_agal	Alismobates galapagoensis	agal	littoral	mix	mi	368	33.9	153_agal_mi	198.356	141.917	196.164	146.027	221.917	165.479	200.548	144.109	201.369	146.849	201.369	149.863	201.095	152.602	200.548	155.616	200.274	158.63	201.095	161.37	202.465	164.109	204.657	166.027	207.123	167.397	210.137	168.219	212.876	167.945	215.89	167.671	218.63	166.575	196.986	149.041	196.164	152.328	195.89	155.342
6	154_agal	Alismobates galapagoensis	agal	littoral	mix	mi	331	29.1	154_agal_mi	150.137	141.096	146.027	141.096	161.643	166.849	150.685	143.835	149.315	146.301	148.219	148.767	146.849	151.233	145.479	153.698	144.657	156.438	144.383	159.178	144.931	161.917	146.301	164.383	148.219	166.027	150.685	167.397	153.424	168.219	156.164	168.493	158.904	167.945	146.027	144.383	144.657	147.397	142.465	149.863
7	155_agal	Alismobates galapagoensis	agal	littoral	mix	mi	360	33.8	155_agal_mi	173.424	230.136	169.315	230.41	170.411	263.835	172.328	233.15	170.959	235.89	168.767	237.808	166.575	239.725	164.383	241.917	162.465	244.109	160.822	246.575	159.452	249.041	158.904	252.054	158.904	254.794	160.274	257.534	161.917	259.999	164.109	261.643	166.849	262.739	167.945	233.424	164.931	235.068	162.191	237.26
8	156_agal	Alismobates galapagoensis	agal	littoral	mix	mi	372	32.1	156_agal_mi	218.904	144.383	214.794	143.835	214.794	175.89	218.356	146.849	216.438	148.767	214.246	150.685	212.054	152.328	209.863	154.246	207.945	156.438	206.575	158.904	205.479	161.37	204.657	164.109	204.383	166.849	205.205	169.589	206.575	172.054	209.041	173.698	211.506	174.52	213.424	146.301	210.41	147.671	207.671	149.589
9	157_agal	Alismobates galapagoensis	agal	littoral	mix	mi	n.a.	32.7	157_agal_mi	197.808	128.493	195.616	130.137	223.013	149.041	200	130.959	200.821	133.698	201.095	136.438	201.095	139.178	201.643	142.191	202.465	144.657	203.835	147.123	205.205	149.589	207.397	151.507	209.863	152.602	212.602	152.876	215.342	152.602	218.082	151.507	220.547	150.411	196.712	133.424	196.712	136.712	196.712	140
10	033_aine	Alismobates inexpectatus	aine	littoral	rock	ro	355.2	35.5206	033_aine_ro	238.84	143.574	235.872	141.955	242.888	178.118	238.301	147.082	236.411	149.781	233.982	152.21	231.554	154.909	229.664	157.608	228.045	160.576	226.696	163.815	225.886	167.053	225.886	170.562	227.236	173.8	229.664	176.229	232.633	177.848	236.142	178.658	239.38	178.658	233.982	145.733	230.204	147.892	226.696	150.591
11	034_aine	Alismobates inexpectatus	aine	littoral	rock	ro	372.7	38.1106	034_aine_ro	265.076	227.631	261.304	231.403	298.749	246.219	268.039	229.247	269.925	231.941	271.002	234.905	272.08	238.137	273.157	241.37	274.235	244.333	276.39	247.027	278.815	249.182	281.508	251.068	284.472	252.684	287.704	253.223	290.937	252.684	293.631	250.798	295.786	248.374	265.076	233.558	265.345	237.329	266.423	241.37
12	035_aine	Alismobates inexpectatus	aine	littoral	rock	ro	388.4	36.2606	035_aine_ro	216.856	180.219	210.66	179.68	219.011	215.778	215.778	183.721	213.892	186.415	211.737	188.84	209.582	191.264	207.697	193.958	206.08	196.921	204.733	199.884	204.195	203.117	204.195	206.619	204.733	209.852	206.35	212.546	209.313	214.162	212.546	215.239	215.778	215.778	208.235	182.913	205.003	185.068	202.04	188.031
13	036_aine	Alismobates inexpectatus	aine	littoral	rock	ro	388.4	36.2606	036_aine_ro	162.979	150.587	156.783	146.815	135.501	175.909	159.477	152.203	155.974	152.472	152.472	152.203	148.701	151.664	145.199	151.664	141.697	151.664	138.195	153.281	135.232	155.166	132.538	157.321	130.383	160.285	129.575	163.787	129.575	167.289	131.46	170.521	133.615	173.215	152.742	145.738	148.97	145.468	144.93	145.199
14	037_aine	Alismobates inexpectatus	aine	littoral	rock	ro	367.1	34.0405	037_aine_ro	301.451	196.74	297.133	196.74	310.088	229.664	301.182	200.248	299.292	203.217	297.133	206.185	294.974	209.154	293.085	212.123	292.006	215.631	291.196	219.139	290.926	222.648	291.736	226.156	293.625	228.855	296.594	230.744	300.102	231.823	303.88	232.093	307.119	231.014	294.974	200.248	291.736	203.487	288.767	206.725
15	038_aine	Alismobates inexpectatus	aine	littoral	rock	ro	346.4	32.5605	038_aine_ro	229.664	111.999	227.775	109.3	199.978	124.413	226.696	112.808	223.727	112.808	221.028	111.459	218.33	110.109	215.631	108.76	212.932	108.22	209.964	107.681	206.995	107.95	204.026	108.49	201.597	110.109	199.978	112.808	199.168	115.507	198.899	118.476	199.168	121.444	224.537	106.871	221.838	104.712	218.6	102.823
16	039_aine	Alismobates inexpectatus	aine	littoral	rock	ro	369.7	32.1905	039_aine_ro	218.203	135.232	217.933	139.273	250.798	137.387	221.705	136.309	223.86	138.734	225.476	141.697	227.631	144.122	230.056	146.546	232.48	148.701	235.174	150.587	238.137	151.664	241.639	152.203	244.602	151.664	247.566	150.048	249.721	147.624	250.798	144.66	250.798	141.158	220.088	142.775	221.705	146.546	224.129	150.048
17	040_aine	Alismobates inexpectatus	aine	littoral	rock	ro	386.7	29.2305	040_aine_ro	264.537	272.08	264.806	276.659	295.786	268.847	268.039	272.888	270.464	275.043	272.619	277.737	274.774	280.431	277.468	282.855	280.161	284.472	283.663	285.549	286.896	286.088	290.398	285.819	293.631	284.472	296.055	282.047	297.402	279.084	297.672	275.582	297.133	272.08	267.5	279.892	269.386	283.663	271.81	286.896
18	041_aine	Alismobates inexpectatus	aine	littoral	rock	ro	373.3	34.0405	041_aine_ro	297.941	87.0117	299.018	90.2443	328.112	71.1179	301.712	86.4729	304.945	87.5504	308.178	88.8974	311.41	90.2443	314.912	91.3219	318.145	91.8606	321.647	91.5912	325.149	90.7831	328.382	89.4362	331.075	87.0117	332.422	84.0484	332.422	80.5464	331.345	77.3138	329.728	74.0811	303.329	92.13	306.831	94.5545	310.871	95.9014
19	042_aine	Alismobates inexpectatus	aine	littoral	rock	ro	367.1	34.0405	042_aine_ro	318.993	253.144	315.485	256.652	342.473	280.941	321.692	256.112	321.962	259.621	321.152	263.129	320.613	266.637	320.073	270.146	320.613	273.654	321.152	277.163	322.232	280.401	324.391	283.37	327.36	285.259	330.598	286.338	334.106	286.338	337.345	285.529	340.314	283.37	315.755	260.97	314.406	264.748	313.596	268.796
20	043_aine	Alismobates inexpectatus	aine	littoral	rock	ro	389.5	35.8906	043_aine_ro	225.476	158.13	221.974	155.436	200.423	183.452	222.782	159.746	219.55	160.823	216.048	160.554	212.815	160.285	209.313	160.015	206.08	160.285	202.578	160.823	199.615	162.17	197.191	164.595	196.113	167.827	195.844	171.06	196.382	174.293	197.191	177.795	198.807	180.758	218.203	154.897	214.431	153.819	210.39	152.742
21	044_aine	Alismobates inexpectatus	aine	littoral	rock	ro	398.7	35.8906	044_aine_ro	141.428	219.55	136.309	219.55	142.236	254.031	139.811	222.782	137.656	225.476	135.501	228.17	133.077	230.594	130.922	233.288	129.305	235.982	127.958	239.215	127.15	242.447	126.881	245.949	127.42	249.182	129.305	251.876	131.999	253.762	135.232	254.839	138.734	254.839	133.615	222.243	130.383	224.668	127.15	227.631
22	045_aine	Alismobates inexpectatus	aine	littoral	rock	ro	371.7	35.8906	045_aine_ro	298.21	185.876	293.361	185.876	297.941	221.435	297.133	189.648	294.978	191.803	292.553	193.958	290.129	196.382	288.243	199.076	286.357	201.77	285.01	204.464	283.933	207.697	283.933	210.929	284.741	214.162	286.357	217.125	288.782	219.28	291.476	220.897	294.708	221.435	290.667	188.031	287.435	190.456	284.741	193.15
23	046_aine	Alismobates inexpectatus	aine	littoral	rock	ro	371.7	35.8906	046_aine_ro	163.248	165.942	160.285	163.517	137.656	189.648	160.015	168.097	156.513	168.097	153.281	167.558	149.779	167.019	146.277	166.481	143.044	166.75	139.542	167.289	136.309	168.636	133.615	170.791	132.538	174.023	131.999	177.256	132.269	180.758	133.346	183.991	134.962	186.954	156.513	162.17	152.472	160.823	148.432	160.285
24	047_aine	Alismobates inexpectatus	aine	littoral	rock	ro	386.7	29.2305	047_aine_ro	202.578	165.403	202.578	160.823	173.485	166.75	199.615	164.325	197.46	161.901	195.305	159.207	193.15	156.513	190.995	154.089	188.301	151.934	185.338	150.587	182.105	150.048	178.603	149.779	175.64	151.395	173.485	153.819	172.407	156.783	172.407	160.285	172.676	163.517	200.154	157.321	199.076	153.281	196.382	150.048
25	048_aine	Alismobates inexpectatus	aine	littoral	rock	ro	372.2	36.6306	048_aine_ro	233.019	145.468	228.439	147.893	245.411	178.872	233.288	148.97	232.75	152.203	230.864	155.436	228.978	158.399	227.631	161.362	226.554	164.595	226.015	168.097	226.015	171.599	227.092	174.832	229.517	177.525	232.211	179.411	235.443	180.489	238.945	180.489	242.447	179.68	226.554	151.395	223.86	154.628	221.435	157.86
26	081_aine	Alismobates inexpectatus	aine	littoral	rock	ro	399	35.5206	081_aine_ro	167.019	143.852	164.864	145.468	196.652	162.17	168.905	146.815	169.444	150.317	170.252	153.55	170.791	157.052	171.599	160.285	172.946	163.517	174.832	166.211	176.987	168.905	179.95	170.521	183.452	171.329	186.684	171.06	189.917	169.713	192.88	168.097	195.035	165.403	165.134	149.509	164.864	153.819	164.864	158.399
27	082_aine	Alismobates inexpectatus	aine	littoral	rock	ro	n.a.	35.1506	082_aine_ro	140.336	138.716	137.097	135.478	111.999	158.687	137.097	140.066	133.858	140.336	130.35	139.526	127.112	138.716	123.603	138.446	120.095	138.177	116.586	138.177	113.348	139.256	110.379	140.875	107.95	143.304	106.601	146.543	106.601	149.781	107.411	153.29	109.57	155.718	133.319	134.398	129.271	133.049	125.492	131.969
28	083_aine	Alismobates inexpectatus	aine	littoral	rock	ro	371	32.5605	083_aine_ro	224.937	177.525	220.897	179.411	249.721	198.807	226.554	180.489	226.554	183.721	226.823	186.954	226.823	190.187	227.092	193.419	227.901	196.652	229.247	199.615	230.864	202.578	233.558	204.464	236.252	205.811	239.484	206.619	242.717	205.542	245.411	203.656	247.566	201.231	220.897	183.452	220.627	187.493	220.358	191.533
29	084_aine	Alismobates inexpectatus	aine	littoral	rock	ro	385	35.1506	084_aine_ro	136.579	221.435	131.191	220.358	124.995	254.3	134.154	224.399	131.191	225.476	127.958	226.823	124.726	228.439	121.762	230.056	118.53	231.672	116.105	234.096	114.22	237.06	113.142	240.292	112.603	243.794	113.412	247.027	115.567	249.721	118.53	251.876	121.493	253.223	127.42	221.435	123.379	222.243	119.607	224.129
30	085_aine	Alismobates inexpectatus	aine	littoral	rock	ro	n.a.	33.6705	085_aine_ro	164.056	119.607	159.207	118.26	153.011	151.395	161.632	122.301	158.938	123.918	155.436	125.264	152.472	126.611	149.509	128.228	146.277	130.113	144.122	132.538	141.697	134.962	140.35	138.195	140.081	141.428	141.428	144.66	143.583	147.354	146.277	149.509	149.24	150.856	155.705	119.607	151.664	120.416	147.893	122.032
31	086_aine	Alismobates inexpectatus	aine	littoral	rock	ro	389	35.5206	086_aine_ro	234.366	247.566	232.48	242.447	200.693	256.186	231.133	247.566	227.631	246.488	224.937	244.333	221.974	242.178	218.741	240.292	215.509	239.215	212.007	238.137	208.505	237.329	205.003	237.868	201.77	239.754	199.076	242.178	198.268	245.68	198.268	249.182	199.076	252.684	228.709	240.292	225.476	237.598	222.243	235.174
32	087_aine	Alismobates inexpectatus	aine	littoral	rock	ro	371	33.6705	087_aine_ro	235.713	185.607	232.48	188.57	256.725	211.468	237.06	189.378	236.521	192.88	235.713	196.113	235.174	199.346	234.905	202.848	235.443	206.35	235.982	209.582	237.06	212.815	239.215	215.239	242.178	217.125	245.411	217.933	248.913	217.395	251.876	215.778	254.57	213.623	231.403	192.611	229.786	196.382	228.709	200.423
33	088_aine	Alismobates inexpectatus	aine	littoral	rock	ro	381	33.6705	088_aine_ro	251.794	235.602	247.746	237.491	265.018	266.098	251.524	239.65	250.445	242.888	248.556	245.857	247.206	249.096	245.857	252.334	245.317	255.842	245.047	259.081	245.047	262.589	246.937	265.558	249.365	268.257	252.604	269.606	255.842	269.876	259.351	269.876	262.589	268.257	245.587	240.999	243.158	244.508	240.999	248.016
34	120_aine	Alismobates inexpectatus	aine	littoral	rock	ro	389	35.5206	120_aine_ro	234.905	247.566	232.211	242.986	200.962	256.455	231.403	247.566	227.901	246.488	224.668	244.602	221.435	242.447	218.472	240.292	214.97	238.676	211.468	237.868	207.697	237.06	203.925	237.598	200.693	238.945	198.807	242.178	197.729	245.68	197.46	249.451	198.268	252.953	228.978	240.562	226.015	237.329	222.243	235.174
35	187_aret	Alismobates reticulatus	aret	littoral	mix	mi	302.7	25.4	187_aret_mi	204.292	129.957	202.754	131.752	222.747	148.669	205.317	132.008	205.83	134.571	206.086	137.391	205.573	139.954	205.061	142.517	204.804	145.337	205.061	147.9	205.83	150.463	207.624	152.514	210.187	153.027	213.007	153.283	215.57	153.027	218.133	152.001	220.44	150.463	202.241	134.571	201.472	137.391	201.216	140.467
36	188_aret	Alismobates reticulatus	aret	littoral	mix	mi	303	20.7	188_aret_mi	204.292	154.052	201.985	155.846	217.877	174.045	205.317	156.103	205.573	158.409	205.317	160.716	204.292	162.767	203.267	164.818	202.754	167.125	202.498	169.431	203.01	171.482	204.292	173.533	206.086	174.814	208.393	175.327	210.7	175.583	213.007	175.327	215.058	174.814	201.729	158.153	200.447	160.204	199.422	162.767
37	189_aret	Alismobates reticulatus	aret	littoral	mix	mi	286.1	20.2	189_aret_mi	237.614	231.462	234.795	233	250.431	252.225	238.383	233.513	238.383	236.076	237.358	238.383	236.076	240.177	235.051	242.484	234.538	245.048	234.538	247.355	234.795	249.918	236.076	251.968	238.127	253.25	240.69	254.019	242.997	254.019	245.56	254.019	247.867	253.25	234.026	235.564	232.231	237.871	230.95	240.434
38	190_aret	Alismobates reticulatus	aret	littoral	mix	mi	288.3	23.1	190_aret_mi	217.877	181.735	214.801	182.248	227.874	205.83	218.646	184.555	218.39	187.118	216.852	189.425	215.058	191.476	213.776	193.782	212.494	196.089	211.982	198.653	212.238	201.472	213.52	203.523	215.826	205.061	218.133	206.342	220.697	206.855	223.26	206.855	225.823	206.342	214.289	185.58	212.494	188.4	210.7	190.707
39	191_aret	Alismobates reticulatus	aret	littoral	mix	mi	304.1	20.5	191_aret_mi	242.741	131.495	239.408	130.726	229.924	153.539	241.203	133.546	238.896	134.827	236.589	135.596	234.026	135.596	231.462	135.853	229.155	136.365	226.849	137.391	224.798	138.929	223.773	141.236	223.516	143.799	224.029	146.362	224.798	148.669	226.08	150.72	228.386	152.258	236.845	131.239	234.026	131.239	231.206	131.752
40	192_aret	Alismobates reticulatus	aret	littoral	mix	mi	309.3	20.2	192_aret_mi	150.207	90.7394	148.156	93.3027	168.663	104.837	151.489	92.5337	152.001	94.5843	152.001	96.8912	152.001	99.1982	151.745	101.249	152.001	103.556	152.77	105.606	154.308	107.144	156.359	108.17	158.409	108.682	160.716	108.426	162.767	108.17	164.818	107.144	166.868	105.863	148.925	95.6096	148.413	98.1729	147.9	100.736
41	193_aret	Alismobates reticulatus	aret	littoral	mix	mi	305.1	23	193_aret_mi	261.709	161.229	261.196	164.561	284.266	170.713	264.016	162.767	265.554	164.561	265.81	167.125	265.81	169.431	265.81	171.995	266.323	174.302	267.604	176.352	269.655	177.634	271.962	178.147	274.525	178.147	276.832	177.378	278.883	175.84	280.677	174.302	282.471	172.507	261.709	167.637	261.453	170.457	261.709	173.02
42	194_aret	Alismobates reticulatus	aret	littoral	mix	mi	300.2	21.9	194_aret_mi	203.523	154.052	204.292	156.872	228.899	156.359	206.599	154.308	208.393	155.846	209.418	158.153	210.187	160.46	211.213	162.767	212.751	164.818	214.801	166.612	216.852	167.637	219.415	167.637	221.978	166.612	224.029	165.33	225.567	163.536	227.105	161.229	228.13	158.922	205.573	159.691	206.086	162.254	207.368	164.818
43	195_aret	Alismobates reticulatus	aret	littoral	mix	mi	302.6	21.9	195_aret_mi	184.811	146.875	182.76	149.694	209.675	157.64	187.118	148.669	188.4	150.72	189.169	153.283	189.938	155.59	190.45	158.153	191.476	160.716	193.013	162.767	194.551	164.818	196.858	166.099	199.678	166.099	201.985	165.33	204.292	164.049	206.086	161.998	207.88	159.947	185.324	151.232	185.836	154.308	186.093	157.384
44	196_aret	Alismobates reticulatus	aret	littoral	mix	mi	288.9	21.3	196_aret_mi	203.01	153.796	204.035	157.384	228.899	156.872	206.086	154.308	208.137	155.59	209.418	157.897	210.187	160.204	210.956	162.511	212.494	164.818	214.289	166.356	216.595	167.381	218.902	167.381	221.466	166.868	223.516	165.587	225.311	163.792	226.849	161.742	227.617	159.178	205.83	159.947	206.599	162.511	207.624	165.074
45	197_aret	Alismobates reticulatus	aret	littoral	mix	mi	299.2	20.1	197_aret_mi	193.27	165.33	192.757	168.919	215.314	175.583	195.833	167.125	197.371	168.919	198.14	171.226	198.653	173.533	199.165	175.84	199.934	178.147	200.96	180.454	202.241	182.248	204.292	183.529	206.599	183.786	208.906	183.017	210.7	181.479	212.238	179.428	213.776	177.634	194.551	171.226	194.808	174.045	195.577	176.609
46	198_aret	Alismobates reticulatus	aret	littoral	mix	mi	292.2	21.3	198_aret_mi	193.782	135.084	190.963	135.853	192.501	161.229	194.039	137.647	193.27	139.954	191.732	141.492	189.681	142.774	187.887	144.312	186.093	145.849	184.555	147.644	183.529	149.694	183.017	152.001	183.529	154.308	184.555	156.359	186.093	158.153	188.143	159.435	190.194	160.204	190.45	137.903	188.143	139.441	185.836	140.723
47	008_cber	Carinozetes bermudensis	cber	littoral	rock	ro	366.2	30.3405	008_cber_ro	244.872	166.75	242.178	164.325	221.974	186.146	242.447	168.366	239.484	168.366	236.79	167.558	234.096	166.481	231.133	165.942	228.17	165.942	225.476	166.481	222.782	167.558	220.627	169.444	219.011	171.868	218.472	174.832	218.472	177.795	219.28	180.489	220.627	182.913	239.215	163.517	236.252	161.901	233.288	160.285
48	009_cber	Carinozetes bermudensis	cber	littoral	rock	ro	358.8	31.8205	009_cber_ro	318.414	193.958	318.684	197.729	350.202	193.958	322.186	195.035	324.341	197.191	325.957	199.884	327.573	202.578	329.459	205.003	331.884	206.888	334.847	208.235	337.81	208.774	341.043	208.235	344.006	207.158	346.43	205.272	348.316	202.848	349.394	199.884	349.932	196.921	321.108	199.884	321.916	203.386	323.533	206.619
49	013_cber	Carinozetes bermudensis	cber	littoral	rock	ro	338.3	34.7805	013_cber_ro	273.966	241.37	271.272	244.602	299.557	264.268	274.504	244.872	274.774	248.374	274.774	251.876	274.504	255.109	274.774	258.611	275.582	261.843	277.198	265.076	279.353	267.5	282.317	269.386	285.549	270.464	288.782	270.733	292.284	270.194	295.247	268.847	297.672	266.423	270.464	248.374	269.925	252.145	269.386	255.917
50	089_cber	Carinozetes bermudensis	cber	littoral	rock	ro	n.a.	30.7105	089_cber_ro	270.464	223.86	271.272	227.362	299.557	216.048	273.966	223.59	276.121	225.476	278.006	227.631	280.431	229.247	282.855	230.594	285.549	231.403	288.512	231.672	291.476	231.672	294.17	231.403	296.594	229.786	298.21	227.362	299.288	224.937	299.827	221.974	299.827	219.28	274.235	228.709	276.39	231.133	278.815	233.288
51	090_cber	Carinozetes bermudensis	cber	littoral	rock	ro	356	34.0405	090_cber_ro	256.725	165.672	261.035	168.097	282.317	143.583	260.227	164.325	263.19	164.325	266.423	165.134	269.386	165.672	272.619	165.942	275.582	165.672	278.815	164.864	281.239	162.979	283.663	161.093	285.549	158.399	286.357	155.436	286.088	152.203	285.28	149.24	284.202	146.277	264.537	169.174	267.77	170.252	271.272	170.791
52	091_cber	Carinozetes bermudensis	cber	littoral	rock	ro	361	35.8906	091_cber_ro	178.334	175.64	174.293	175.64	183.991	210.66	178.064	178.603	176.987	181.566	174.562	183.452	172.407	185.607	170.791	188.031	169.713	190.995	169.174	193.958	169.444	197.191	169.983	200.154	171.329	202.848	173.215	205.272	175.37	207.427	178.064	209.044	181.027	209.852	173.215	178.872	170.521	180.758	167.827	182.913
53	092_cber	Carinozetes bermudensis	cber	littoral	rock	ro	349	31.8205	092_cber_ro	209.313	230.594	205.811	228.709	188.031	255.109	206.619	231.941	203.656	232.211	200.962	232.211	197.999	232.211	195.035	232.75	192.342	233.558	189.917	235.174	187.493	237.06	185.607	239.215	184.26	241.909	183.452	244.602	183.452	247.566	184.529	250.26	186.146	252.684	201.77	227.631	198.537	226.823	195.305	226.823
54	093_cber	Carinozetes bermudensis	cber	littoral	rock	ro	370	31.4505	093_cber_ro	188.57	148.162	188.57	143.852	157.321	146.007	185.607	147.624	183.721	145.199	182.644	142.505	181.297	139.811	179.142	137.387	176.717	135.501	174.023	133.885	171.329	133.077	168.097	132.807	165.134	133.615	162.709	134.962	160.823	137.387	159.207	140.081	158.399	143.044	187.493	140.619	186.146	137.117	183.991	134.424
55	094_cber	Carinozetes bermudensis	cber	littoral	rock	ro	354	35.5206	094_cber_ro	249.721	188.57	245.68	188.57	246.758	223.59	248.374	191.803	246.219	194.227	243.794	196.113	240.831	197.46	238.676	199.615	236.79	202.309	235.443	205.272	234.635	208.235	234.366	211.468	235.174	214.701	236.252	217.395	238.407	219.819	241.1	221.705	244.333	222.513	243.525	190.995	240.023	192.342	236.79	193.958
56	095_cber	Carinozetes bermudensis	cber	littoral	rock	ro	358	34.0405	095_cber_ro	138.195	216.586	134.154	218.472	146.007	249.99	138.464	220.088	136.848	222.782	134.424	224.937	132.269	227.092	130.922	229.786	130.113	232.75	129.575	235.982	129.305	239.215	129.844	242.178	131.191	245.141	133.615	247.296	136.04	248.913	139.273	249.99	142.236	250.26	131.191	221.166	128.767	223.59	126.881	226.554
57	096_cber	Carinozetes bermudensis	cber	littoral	rock	ro	374	32.9305	096_cber_ro	334.106	120.365	331.138	122.794	355.157	145.463	334.916	124.143	335.456	127.381	334.376	130.08	333.567	133.049	333.027	136.018	333.297	138.986	334.376	141.955	335.996	144.384	338.425	146.543	340.853	148.162	344.092	148.432	347.061	148.702	350.029	148.432	352.728	146.813	330.598	126.032	329.519	129.271	328.169	132.509
58	129_cman	Carinozetes mangrovi	cman	littoral	mangrove	ma	340	32.1	129_cman_ma	198.082	203.287	195.89	206.575	224.657	221.095	200	205.753	200.548	208.493	201.369	211.232	201.917	213.972	202.739	216.986	203.835	219.452	205.205	221.917	206.849	224.109	209.315	225.479	212.054	226.301	215.068	226.575	217.808	226.027	220.273	224.657	222.465	223.013	196.986	210.137	197.26	213.15	197.808	216.438
59	131_cman	Carinozetes mangrovi	cman	littoral	mangrove	ma	355	34	131_cman_ma	154.246	201.917	150.137	201.917	150.411	235.342	152.602	204.657	150.411	206.575	147.945	208.219	145.753	209.863	143.835	212.054	141.917	214.52	140.548	216.986	140	219.726	139.452	222.739	140	225.479	141.096	228.219	142.465	230.684	144.931	232.328	147.397	233.972	147.397	203.561	144.657	205.479	142.191	207.397
60	133_cman	Carinozetes mangrovi	cman	littoral	mangrove	ma	363	33.3	133_cman_ma	206.849	153.424	202.739	154.794	215.616	185.753	206.575	156.438	205.479	159.178	203.835	161.643	201.643	163.835	200.274	166.575	199.726	169.315	199.178	172.328	199.452	175.342	200.274	178.356	201.643	180.822	204.109	182.739	206.575	184.383	209.315	185.479	212.328	185.753	201.095	157.534	199.178	160	197.26	163.013
61	135_cman	Carinozetes mangrovi	cman	littoral	mangrove	ma	n.a.	n.a.	135_cman_ma	300.273	190.137	297.808	188.767	288.493	223.561	298.629	192.602	296.438	195.068	293.698	196.438	290.684	197.534	287.671	198.63	284.931	200.274	283.013	202.739	281.095	205.479	279.999	208.219	279.451	211.506	279.999	214.52	281.369	217.534	283.287	220	285.753	221.917	295.616	191.232	292.602	192.328	289.04	193.15
62	136_cman	Carinozetes mangrovi	cman	littoral	mangrove	ma	352	35.7	136_cman_ma	300.273	187.123	297.808	190.411	324.383	213.15	302.465	190.411	303.013	193.424	302.739	196.712	302.465	199.726	302.465	203.013	303.013	206.027	304.109	208.767	305.479	211.506	307.397	213.698	309.862	215.068	312.876	215.89	315.89	216.164	318.629	215.342	321.369	213.972	298.082	193.698	298.082	196.986	298.082	200.274
63	137_cman	Carinozetes mangrovi	cman	littoral	mangrove	ma	352	31.9	137_cman_ma	191.232	158.904	188.493	159.452	202.739	187.397	191.506	161.643	190.685	164.383	189.041	166.575	187.397	168.493	186.027	170.959	185.479	173.698	185.753	176.438	186.301	179.178	187.671	181.369	189.315	183.561	191.506	185.205	193.972	186.301	196.712	186.849	199.452	187.123	186.849	161.917	184.931	164.383	183.013	167.123
64	138_cman	Carinozetes mangrovi	cman	littoral	mangrove	ma	349	32.2	138_cman_ma	207.945	172.876	206.027	169.589	181.917	189.863	205.205	172.876	202.191	172.876	199.452	172.328	196.712	171.78	193.972	170.959	191.232	170.959	188.493	171.506	185.753	172.328	183.561	174.246	181.917	176.438	180.822	178.904	180.274	181.643	180.548	184.383	181.095	187.397	202.465	169.315	199.726	167.945	196.712	166.849
65	300_cham	Chamobates sp.	cham	terrestrial	terrestic	te	488	19.6	300_cham_te	133.348	131.009	131.009	128.929	122.171	146.865	132.049	132.049	130.229	132.049	128.409	132.049	126.33	132.049	124.51	132.308	122.691	132.828	121.131	133.608	120.091	135.168	119.052	136.727	118.532	138.807	118.272	140.626	118.792	142.446	119.312	144.266	120.611	145.565	128.669	128.149	126.33	127.63	124.25	127.63
66	301_cham	Chamobates sp.	cham	terrestrial	terrestic	te	505	21	301_cham_te	171.299	134.648	167.92	136.467	187.415	142.186	172.339	136.208	172.859	138.027	173.119	140.107	173.119	141.926	173.379	143.746	174.418	145.305	175.718	146.865	177.278	147.905	179.097	148.165	180.917	148.165	182.996	147.905	184.296	146.605	185.336	145.045	186.116	143.226	169.22	138.547	168.7	141.146	168.7	143.486
67	302_cham	Chamobates sp.	cham	terrestrial	terrestic	te	509	22.3	302_cham_te	199.372	147.905	195.473	145.825	190.794	167.92	198.073	149.204	195.733	150.244	193.654	150.764	191.314	151.284	189.235	151.804	187.415	153.103	185.856	154.403	184.296	156.223	183.776	158.562	183.776	160.642	184.296	162.981	185.336	164.801	187.155	166.36	188.975	167.14	193.394	147.385	190.794	147.385	188.195	147.645
68	303_cham	Chamobates sp.	cham	terrestrial	terrestic	te	546	21.5	303_cham_te	312.965	233.944	309.846	236.024	331.421	243.042	314.005	236.024	314.525	238.103	315.305	239.923	315.565	242.002	316.085	244.082	316.864	245.901	318.164	247.201	319.984	248.241	322.063	249.021	323.883	249.021	325.962	248.501	327.782	247.461	329.082	246.161	330.121	244.342	311.146	238.103	311.666	240.703	311.926	243.042
69	304_cham	Chamobates sp.	cham	terrestrial	terrestic	te	474	19.6	304_cham_te	194.694	227.706	191.834	225.106	182.476	243.562	193.654	228.486	191.834	228.486	189.755	228.486	187.935	228.486	186.116	228.486	184.296	229.265	182.736	230.045	181.177	231.345	180.397	232.904	179.877	234.724	179.357	236.544	179.097	238.363	179.357	240.183	180.397	241.742	189.235	224.846	186.895	224.326	184.556	224.326
70	305_cham	Chamobates sp.	cham	terrestrial	terrestic	te	503	16.2	305_cham_te	229.785	189.495	228.226	192.094	247.201	189.495	231.605	190.794	232.385	192.354	233.684	193.914	234.724	195.473	235.764	196.773	237.323	197.553	239.143	198.333	240.963	198.333	242.782	198.073	244.342	197.293	245.901	196.253	246.681	194.694	247.201	192.874	247.461	191.054	229.525	193.654	230.045	195.993	231.085	198.333
71	306_cham	Chamobates sp.	cham	terrestrial	terrestic	te	468	20.1	306_cham_te	223.027	145.565	222.507	148.944	242.522	143.226	224.846	146.085	226.146	147.385	227.446	148.685	228.745	149.984	230.305	151.284	231.865	151.804	233.944	152.064	235.764	152.064	237.583	152.324	239.403	151.544	240.963	150.504	242.262	149.204	242.782	147.385	242.782	145.305	224.586	149.984	225.626	152.064	226.926	153.883
72	Terr_Sch_001	Chamobates sp.	cham	terrestrial	terrestic	te	498	21.4	307_cham_te	82.968	126.757	79.8951	124.196	72.2129	141.865	81.1755	127.269	79.1269	127.269	77.3343	127.269	75.2858	127.525	73.4932	127.781	71.7007	128.293	70.1643	129.573	68.8839	131.11	68.1157	132.646	67.6035	134.439	67.3475	136.487	67.8596	138.28	69.14	139.816	70.6764	140.841	77.5904	123.94	75.2858	123.684	73.2372	123.94
73	Terr_Sch_002	Chamobates sp.	cham	terrestrial	terrestic	te	499	18.3	308_cham_te	114.977	193.08	117.026	190.519	97.5642	194.872	114.209	191.799	113.185	190.263	111.904	188.983	110.624	187.702	109.344	186.678	107.551	186.166	105.759	186.166	103.966	185.91	102.174	186.166	100.637	186.678	99.3567	187.958	98.0763	189.239	97.8203	191.031	97.5642	192.824	115.745	188.47	114.721	186.166	113.441	184.373
74	Terr_Sch_003	Chamobates sp.	cham	terrestrial	terrestic	te	497	22.1	309_cham_te	196.665	150.315	192.824	150.828	210.493	163.119	196.921	152.364	196.921	154.157	196.665	156.205	196.409	157.998	196.409	160.046	196.921	161.839	197.945	163.375	199.482	164.912	200.762	165.936	202.555	166.96	204.603	166.96	206.396	166.704	207.932	165.68	209.212	164.143	193.336	153.388	192.824	155.949	192.055	158.254
75	202_ddor	Dolicheremeus dorni	ddor	terrestrial	terrestic	te	584.9	27.1	202_ddor_te	240.69	140.979	238.896	138.672	221.466	157.64	238.383	141.748	236.333	141.492	234.026	141.236	231.719	140.723	229.412	140.723	227.361	140.979	225.054	142.005	223.004	143.03	221.466	144.312	220.44	146.362	219.415	148.413	219.415	150.72	219.928	152.77	220.953	155.077	236.076	138.16	233.513	137.903	230.95	137.391
76	203_ddor	Dolicheremeus dorni	ddor	terrestrial	terrestic	te	544.1	23.6	203_ddor_te	132.264	140.21	130.726	143.543	156.359	145.337	133.802	142.005	135.084	143.543	135.853	145.337	137.391	147.131	138.416	148.669	139.954	150.207	141.748	151.232	143.799	151.489	145.849	151.745	148.156	151.489	149.951	150.72	151.745	149.694	153.539	148.413	154.821	146.618	132.777	144.824	133.546	147.131	134.571	149.438
77	204_ddor	Dolicheremeus dorni	ddor	terrestrial	terrestic	te	571.9	25.1	204_ddor_te	201.216	197.884	202.498	194.808	177.121	193.782	199.422	196.346	197.627	195.064	196.602	193.013	195.833	190.963	194.808	188.912	193.013	187.631	191.219	186.349	188.912	185.58	186.862	185.067	184.555	185.58	182.76	186.862	180.71	187.887	179.428	189.938	178.659	191.988	201.472	192.757	200.447	190.45	198.909	188.4
78	206_ddor	Dolicheremeus dorni	ddor	terrestrial	terrestic	te	595.2	28.3	206_ddor_te	252.225	192.757	249.405	190.707	235.82	213.776	250.687	193.526	248.124	194.039	245.817	194.039	243.253	194.039	240.946	194.551	238.64	195.577	236.589	196.858	235.051	198.396	233.513	200.447	232.488	202.754	232.231	205.061	232.488	207.624	233.257	209.931	234.538	211.725	246.586	190.707	243.766	190.45	240.946	190.45
79	207_ddor	Dolicheremeus dorni	ddor	terrestrial	terrestic	te	624.5	26.1	207_ddor_te	181.735	154.565	177.89	152.258	173.02	180.454	179.941	155.59	178.147	156.872	176.096	157.897	174.045	159.178	172.507	160.716	170.713	162.254	169.431	164.049	168.663	166.356	168.15	168.663	167.894	170.969	168.406	173.276	168.919	175.327	170.2	177.378	171.738	179.172	175.583	153.539	172.764	154.565	170.457	155.846
80	208_ddor	Dolicheremeus dorni	ddor	terrestrial	terrestic	te	604.7	24.9	208_ddor_te	264.785	164.305	261.453	165.587	265.041	192.501	265.554	166.612	264.785	168.919	263.247	170.713	261.453	172.507	259.658	174.045	258.12	175.84	257.351	178.147	256.582	180.454	256.326	182.76	256.326	185.067	256.839	187.374	258.377	189.169	260.427	190.707	262.478	191.476	260.684	168.15	258.633	169.944	256.582	171.482
81	209_ddor	Dolicheremeus dorni	ddor	terrestrial	terrestic	te	557.5	24.4	209_ddor_te	293.237	160.46	290.417	160.716	288.623	183.529	292.468	162.511	290.93	164.049	289.136	165.33	287.085	166.099	285.035	167.125	283.497	168.663	281.959	170.2	280.933	172.251	280.164	174.302	280.421	176.352	281.446	178.403	282.728	180.197	284.522	181.479	286.572	182.248	288.367	161.998	286.06	162.767	284.009	163.792
82	018_fatl	Fortuynia atlantica	fatl	littoral	rock	ro	444.4	29.2305	018_fatl_ro	182.105	262.921	180.489	259.149	160.285	281.508	178.334	263.46	175.101	262.921	172.138	261.843	168.905	260.766	165.672	260.227	162.44	260.227	159.207	260.766	156.513	262.382	154.628	265.076	153.281	268.039	153.011	271.272	153.55	274.235	155.436	276.929	157.86	279.084	175.909	257.533	172.407	255.378	168.636	254.3
83	019_fatl	Fortuynia atlantica	fatl	littoral	rock	ro	427.3	30.7105	019_fatl_ro	203.925	231.133	199.884	227.901	178.872	247.835	200.423	232.211	197.191	231.403	194.227	230.056	191.264	228.978	188.031	228.17	184.799	227.901	181.566	227.901	178.603	228.978	176.178	231.133	174.023	233.558	173.485	236.79	173.754	240.023	175.101	242.986	176.987	245.68	197.191	225.745	193.689	224.129	189.917	223.052
84	020_fatl	Fortuynia atlantica	fatl	littoral	rock	ro	441.2	32.1905	020_fatl_ro	249.635	160.036	245.317	161.116	262.589	189.183	249.635	163.005	249.905	165.704	249.096	168.403	248.016	171.101	247.476	173.8	246.937	176.769	246.667	179.468	246.937	182.436	247.746	184.865	249.365	187.294	251.524	188.913	254.223	189.453	256.922	189.993	259.891	189.183	244.238	164.624	243.158	167.863	241.809	171.101
85	021_fatl	Fortuynia atlantica	fatl	littoral	rock	ro	415.3	31.0805	021_fatl_ro	216.317	141.697	212.546	139.811	207.966	171.06	214.431	144.122	212.007	146.007	209.313	147.085	206.619	148.162	203.925	149.509	201.77	151.664	199.615	153.819	197.999	156.244	197.191	158.938	196.921	161.901	197.729	164.864	199.346	167.019	201.77	168.905	204.733	169.983	209.044	141.697	205.272	141.966	202.04	143.583
86	022_fatl	Fortuynia atlantica	fatl	littoral	rock	ro	409.4	27.0104	022_fatl_ro	160.306	161.386	157.068	159.767	151.4	186.754	158.687	163.545	155.988	164.894	153.02	165.164	150.321	165.704	147.622	167.053	145.193	168.673	143.034	170.562	141.145	172.721	140.336	175.419	140.605	178.388	141.955	181.087	143.844	183.246	146.003	184.865	148.972	185.945	153.559	160.306	150.051	160.306	146.813	161.116
87	023_fatl	Fortuynia atlantica	fatl	littoral	rock	ro	441.2	32.1905	023_fatl_ro	319.492	150.317	318.684	155.974	351.01	157.86	322.455	152.742	324.61	155.436	325.957	158.668	327.035	161.901	328.92	164.864	331.075	167.827	333.5	170.252	336.463	172.138	339.965	172.676	343.198	172.407	346.43	170.791	348.316	168.097	349.124	164.595	349.394	161.093	321.377	158.668	322.186	162.709	323.533	166.481
88	024_fatl	Fortuynia atlantica	fatl	littoral	rock	ro	436.9	29.9705	024_fatl_ro	271.81	203.117	267.5	201.501	271.272	232.48	269.386	205.811	267.231	208.235	264.806	210.121	262.382	212.276	259.688	214.162	257.533	216.586	255.917	219.28	255.378	222.243	255.647	225.476	256.725	228.439	258.88	230.864	261.843	232.48	264.806	233.019	268.039	232.48	265.076	204.195	261.035	205.542	257.533	207.697
89	025_fatl	Fortuynia atlantica	fatl	littoral	rock	ro	439	30.3405	025_fatl_ro	213.892	213.084	210.121	213.354	217.933	242.447	213.892	216.317	212.546	218.741	210.929	221.166	208.505	223.052	206.35	224.937	205.003	227.631	204.195	230.594	203.925	233.558	203.656	236.252	204.464	239.215	206.619	241.1	209.313	242.447	212.276	242.717	214.97	242.986	209.044	216.048	205.811	217.664	202.848	219.819
90	026_fatl	Fortuynia atlantica	fatl	littoral	rock	ro	436.1	26.6404	026_fatl_ro	270.464	142.505	269.655	146.277	296.863	145.738	273.157	144.391	274.774	146.815	276.121	149.779	277.198	152.472	279.084	154.897	280.97	157.321	283.394	158.938	286.088	160.015	289.321	160.285	292.014	159.477	294.17	157.321	295.786	154.628	296.863	151.664	296.863	148.701	270.464	149.779	271.272	153.281	272.888	156.783
91	027_fatl	Fortuynia atlantica	fatl	littoral	rock	ro	421.1	32.1905	027_fatl_ro	226.823	122.032	224.129	118.799	204.464	143.852	224.129	122.84	220.897	123.109	217.664	122.84	214.431	122.571	211.468	122.301	208.235	122.571	205.272	123.379	202.578	125.264	200.423	127.42	199.076	130.113	198.807	133.346	199.346	136.309	200.962	139.273	202.848	141.697	220.088	118.26	216.586	116.914	213.084	116.105
92	029_fatl	Fortuynia atlantica	fatl	littoral	rock	ro	430.8	30.7105	029_fatl_ro	203.656	260.227	203.386	256.725	180.758	278.545	200.423	260.496	197.191	260.496	194.227	259.688	191.264	258.88	188.301	258.341	185.338	258.341	182.374	258.88	179.411	259.957	177.256	262.113	175.909	264.806	175.64	267.77	175.64	271.002	176.987	273.696	178.334	276.39	199.615	256.186	195.844	254.57	192.342	252.953
93	030_fatl	Fortuynia atlantica	fatl	littoral	rock	ro	438.1	31.4505	030_fatl_ro	213.354	164.595	210.929	160.823	192.611	187.762	209.852	165.942	206.619	165.942	203.656	164.864	200.693	164.864	197.46	165.134	194.227	165.672	191.264	167.019	188.57	168.636	186.415	171.06	185.338	174.023	185.607	177.256	186.684	180.219	188.031	183.182	190.456	185.068	206.888	160.285	203.117	159.207	199.346	158.938
94	031_fatl	Fortuynia atlantica	fatl	littoral	rock	ro	420.8	28.1204	031_fatl_ro	162.44	210.39	160.823	206.08	140.081	227.901	159.207	210.121	156.244	209.582	153.281	208.774	150.317	207.697	147.354	207.427	144.391	207.697	141.428	208.235	138.734	209.582	136.309	211.199	134.962	213.892	134.693	216.856	135.232	219.819	136.309	222.513	138.464	224.937	157.321	204.464	154.089	202.848	150.587	201.501
95	032_fatl	Fortuynia atlantica	fatl	littoral	rock	ro	430.8	30.7105	032_fatl_ro	286.627	118.799	284.472	121.493	314.373	132.269	288.782	121.224	290.129	124.187	290.398	127.42	290.937	130.652	291.745	133.885	292.823	137.117	294.708	139.542	297.133	141.697	300.365	143.044	303.598	143.583	306.561	142.505	309.255	140.619	311.41	137.926	313.027	135.232	285.01	125.534	285.01	129.575	285.28	133.615
96	060_fatl	Fortuynia atlantica	fatl	littoral	rock	ro	422	31.8205	060_fatl_ro	298.48	170.252	298.21	174.832	329.728	176.987	301.443	172.407	303.598	174.562	304.676	177.256	306.022	180.219	307.639	182.913	309.794	185.068	311.949	187.223	314.912	188.57	317.875	189.378	320.839	189.109	323.533	187.762	325.688	185.876	327.573	183.182	328.382	180.219	299.827	178.064	300.635	181.836	302.251	185.068
97	073_fatl	Fortuynia atlantica	fatl	littoral	rock	ro	424	31.8205	073_fatl_ro	284.202	137.117	289.051	137.926	299.557	108.832	286.357	134.424	289.051	132.538	292.014	131.999	295.516	131.73	298.749	131.46	301.712	130.113	304.406	128.497	306.831	126.342	308.716	123.648	309.255	120.416	308.716	117.183	307.369	114.22	305.484	111.795	302.52	110.179	292.553	137.926	296.594	138.195	300.365	137.656
98	074_fatl	Fortuynia atlantica	fatl	littoral	rock	ro	440	24.7904	074_fatl_ro	205.272	126.881	203.386	124.726	190.187	146.007	202.578	127.958	200.154	127.958	197.46	127.689	195.035	127.689	192.342	127.689	189.917	128.497	187.762	129.575	185.876	131.191	184.529	133.346	183.721	135.771	184.26	138.195	185.068	140.619	186.415	143.044	188.301	144.391	200.154	123.918	197.191	123.109	193.958	123.109
99	075_fatl	Fortuynia atlantica	fatl	littoral	rock	ro	428	29.9705	075_fatl_ro	185.607	201.231	182.105	200.962	197.191	228.978	185.338	204.464	184.26	207.427	182.374	210.121	181.027	212.815	179.68	215.509	178.872	218.472	178.872	221.705	179.142	224.668	180.219	227.631	182.105	230.056	184.799	231.403	188.031	231.941	190.995	231.403	193.958	230.325	180.219	204.733	177.795	207.697	175.101	210.66
100	076_fatl	Fortuynia atlantica	fatl	littoral	rock	ro	442	29.2305	076_fatl_ro	281.508	239.215	276.659	240.831	293.361	265.345	281.239	242.447	280.431	245.141	278.815	247.566	277.468	250.26	276.39	252.953	275.582	255.647	275.043	258.611	275.312	261.574	276.929	263.998	279.084	265.884	281.778	266.692	284.741	266.962	287.704	266.962	290.398	266.423	275.312	243.794	272.888	246.488	271.002	249.451
101	077_fatl	Fortuynia atlantica	fatl	littoral	rock	ro	434	31.0805	077_fatl_ro	245.141	201.501	241.37	200.962	252.415	231.403	244.872	204.733	242.986	207.158	240.562	209.582	238.137	211.737	236.79	214.701	235.443	217.395	234.096	220.627	233.827	223.86	234.366	226.823	236.252	229.517	238.945	231.403	241.909	232.211	245.141	232.48	248.374	231.941	238.945	203.925	235.713	206.08	233.019	209.044
102	078_fatl	Fortuynia atlantica	fatl	littoral	rock	ro	436	34.7805	078_fatl_ro	210.66	153.819	207.158	154.089	234.366	179.142	211.199	157.86	210.929	161.093	210.929	164.595	210.39	167.827	210.66	171.329	211.468	174.562	212.546	177.795	214.162	180.758	216.317	183.452	219.011	185.338	222.513	185.876	225.745	184.799	228.709	183.182	231.403	181.027	207.158	158.668	205.811	162.44	205.272	166.75
103	079_fatl	Fortuynia atlantica	fatl	littoral	rock	ro	422	31.8205	079_fatl_ro	275.043	172.407	272.08	175.37	298.749	190.995	276.929	175.37	276.929	178.334	277.198	181.297	277.198	184.26	277.468	187.223	277.737	190.187	279.353	192.88	280.97	195.035	283.394	196.921	286.357	197.999	289.321	197.999	292.014	196.652	294.17	194.766	296.594	192.88	271.541	178.872	270.733	182.644	270.464	186.146
104	080_fatl	Fortuynia atlantica	fatl	littoral	rock	ro	435	27.7504	080_fatl_ro	176.987	223.59	174.293	223.321	188.301	248.643	176.717	226.823	175.64	230.056	172.946	232.211	170.791	234.635	168.905	237.598	168.097	240.831	167.827	244.064	168.366	247.296	170.252	250.26	172.407	252.415	175.64	253.492	178.872	253.492	182.105	252.415	185.068	250.798	171.329	226.284	167.827	228.709	165.672	232.211
105	114_fhaw	Fortuynia hawaiensis	fhaw	littoral	rock	ro	419	22.5704	114_fhaw_ro	248.104	159.997	247.564	163.241	268.374	170.808	250.537	161.349	251.077	164.051	251.347	166.754	251.347	169.457	251.618	172.159	252.158	174.862	253.239	177.294	254.861	179.457	257.293	180.538	259.996	180.808	262.699	179.997	264.861	178.376	266.212	175.943	267.293	173.511	248.104	166.214	247.564	169.457	247.564	172.97
106	115_fhaw	Fortuynia hawaiensis	fhaw	littoral	rock	ro	412	26.6404	115_fhaw_ro	196.754	211.078	195.943	208.645	171.349	214.861	194.321	211.618	192.159	210.807	190.267	209.186	188.646	207.564	186.754	205.943	184.862	204.321	182.7	203.24	180.267	202.7	177.835	202.7	175.673	203.51	174.051	205.132	172.7	207.294	172.159	209.456	171.619	211.889	194.051	206.483	192.429	203.781	190.538	201.348
107	116_fhaw	Fortuynia hawaiensis	fhaw	littoral	rock	ro	n.a.	27.3804	116_fhaw_ro	200.808	176.754	198.916	174.322	176.484	187.024	198.105	178.105	195.132	177.835	192.7	176.213	190.538	174.322	188.105	172.7	185.402	171.619	182.43	171.078	179.457	171.078	176.754	171.889	174.322	173.511	173.241	176.484	172.97	179.186	173.511	182.159	174.862	184.862	196.213	173.511	193.781	170.808	191.078	168.376
108	117_fhaw	Fortuynia hawaiensis	fhaw	littoral	rock	ro	420	22.5704	117_fhaw_ro	172.159	133.782	169.727	135.133	187.024	150.268	172.43	135.944	172.97	137.565	173.241	139.457	172.97	142.16	172.7	144.863	172.97	151.349	174.322	153.781	177.294	156.214	179.186	156.484	181.078	156.214	184.051	154.052	185.132	152.971	185.673	151.889	186.213	151.079	169.997	138.376	168.646	141.349	167.565	144.322
109	118_fhaw	Fortuynia hawaiensis	fhaw	littoral	rock	ro	410	24.7904	118_fhaw_ro	229.456	165.673	228.915	162.7	206.753	173.511	226.753	165.673	224.591	164.592	222.159	163.241	219.997	161.619	217.834	160.538	215.402	159.997	212.97	159.457	210.267	159.187	207.835	159.727	205.672	161.079	204.591	163.241	204.321	165.673	204.862	168.376	205.402	170.808	226.213	161.349	224.321	158.376	221.888	156.214
110	119_fhaw	Fortuynia hawaiensis	fhaw	littoral	rock	ro	387	23.6804	119_fhaw_ro	205.672	167.835	203.51	167.295	198.916	189.997	204.321	169.727	202.159	171.078	199.727	171.619	197.294	172.43	194.862	173.511	192.7	174.592	191.078	176.484	189.456	178.646	188.916	181.078	188.916	183.781	189.727	186.213	191.348	187.835	193.51	188.916	196.213	189.456	200.267	167.295	197.024	167.295	193.781	168.105
111	121_fhaw	Fortuynia hawaiensis	fhaw	littoral	rock	ro	409	30.7105	121_fhaw_ro	202.429	156.484	198.105	156.214	186.484	182.43	201.889	159.187	199.997	161.079	197.564	162.43	194.862	163.241	191.889	163.511	189.186	164.051	186.754	165.403	184.321	166.754	182.159	168.376	180.538	170.538	179.997	173.241	180.538	175.943	181.619	178.376	183.511	180.267	195.943	157.835	192.7	158.106	189.456	158.376
112	123_fhaw	Fortuynia hawaiensis	fhaw	littoral	rock	ro	412	26.6404	123_fhaw_ro	249.456	158.916	247.564	161.349	268.104	177.565	251.618	161.079	252.158	163.781	251.618	166.484	251.077	169.187	250.807	172.159	250.537	174.862	251.347	177.565	252.158	180.538	254.05	182.43	256.482	183.511	259.455	183.511	262.158	182.97	264.32	181.348	266.482	179.186	247.834	164.322	246.212	167.295	245.402	170.808
113	139_frot	Fortuynia rotunda	frot	littoral	mangrove	ma	n.a.	n.a.	139_frot_ma	232.054	89.8628	225.205	91.2327	256.986	143.013	232.602	95.8902	230.684	101.644	227.945	106.849	225.205	112.055	223.013	117.534	221.095	123.287	220	129.041	220.821	134.794	224.109	139.452	228.493	143.561	233.972	145.753	239.725	146.849	245.479	146.575	251.232	145.205	224.383	97.808	220.273	103.561	215.89	109.041
114	140_frot	Fortuynia rotunda	frot	littoral	mangrove	ma	644	54	140_frot_ma	356.712	253.424	351.232	257.808	404.109	276.164	358.903	258.904	359.451	264.657	359.725	270.684	360.547	276.712	361.917	282.465	364.109	287.945	367.122	293.15	371.78	296.712	377.533	298.082	383.287	296.986	388.492	294.246	393.424	290.684	397.259	286.301	400.273	281.369	352.876	264.657	352.876	271.506	352.876	278.63
115	141_frot	Fortuynia rotunda	frot	littoral	mangrove	ma	634	59	141_frot_ma	196.712	121.096	193.424	125.479	251.232	145.753	201.095	126.849	203.561	132.055	204.109	138.082	205.205	143.835	206.027	149.863	208.767	155.068	212.054	160.274	216.712	163.835	222.465	164.931	228.493	164.109	233.972	162.191	238.904	158.904	243.287	154.794	247.397	150.411	196.438	130.959	196.712	138.082	196.712	145.205
116	142_frot	Fortuynia rotunda	frot	littoral	mangrove	ma	648	61.3	142_frot_ma	184.931	136.164	180.548	132.328	144.109	182.465	179.452	139.452	173.15	140.822	166.575	140	160.274	138.356	153.972	137.534	147.397	137.808	141.096	139.726	135.342	142.739	131.507	147.945	130.137	153.972	130.685	160.548	132.602	166.849	135.342	172.602	139.178	178.082	173.424	132.328	166.301	130.685	159.178	129.589
117	143_frot	Fortuynia rotunda	frot	littoral	mangrove	ma	n.a.	54.4	143_frot_ma	218.63	141.917	213.424	146.027	262.739	175.068	222.191	146.575	223.561	152.054	223.561	157.534	223.287	163.013	223.561	168.767	224.657	173.972	227.397	178.904	230.136	183.835	234.52	187.123	239.725	188.767	245.479	188.767	250.41	186.575	255.068	183.561	258.904	179.726	216.164	152.054	215.616	158.356	215.342	164.931
118	144_frot	Fortuynia rotunda	frot	littoral	mangrove	ma	662	58	144_frot_ma	160.822	170.137	164.383	174.794	207.397	133.698	166.849	167.397	173.15	167.397	178.63	169.863	184.109	172.602	189.863	174.246	196.164	174.246	202.191	173.698	207.945	172.054	212.876	168.219	215.342	162.739	216.164	156.712	215.616	150.685	213.698	144.657	211.232	139.178	171.506	175.068	177.534	178.356	184.109	181.369
119	145_frot	Fortuynia rotunda	frot	littoral	mangrove	ma	642	63	145_frot_ma	240.273	126.301	235.342	129.863	274.794	180.822	242.191	132.328	242.191	138.904	239.452	144.931	236.164	150.959	233.15	156.712	231.78	163.287	231.506	169.863	233.424	176.164	237.534	181.095	243.013	184.657	249.588	186.027	256.164	185.753	262.739	184.383	269.041	182.191	234.52	136.986	230.136	142.739	226.575	149.041
120	146_frot	Fortuynia rotunda	frot	littoral	mangrove	ma	646	59.6	146_frot_ma	236.164	115.616	230.684	119.452	272.602	164.109	236.986	121.37	236.712	127.123	234.794	132.328	232.876	137.808	231.78	143.561	231.232	149.315	231.78	155.068	234.52	160	238.63	164.109	244.109	166.301	249.588	167.671	255.342	168.219	261.095	167.945	266.849	166.575	229.041	125.753	226.301	131.507	224.383	137.808
121	147_frot	Fortuynia rotunda	frot	littoral	mangrove	ma	633	62.7	147_frot_ma	179.178	206.849	183.561	212.602	232.602	174.246	185.205	206.027	190.685	206.027	195.89	207.945	200.821	210.41	206.027	211.78	211.506	211.506	216.986	210.958	222.191	209.041	226.301	205.479	229.589	201.095	232.054	196.438	233.698	190.958	234.246	185.753	233.424	180.274	189.041	214.52	194.794	217.26	200.274	219.726
122	148_frot	Fortuynia rotunda	frot	littoral	mangrove	ma	n.a.	61.1	148_frot_ma	212.602	161.096	215.89	166.027	264.931	130.685	219.178	159.726	224.931	161.643	230.136	164.657	235.342	167.671	241.095	169.863	246.849	171.232	252.876	171.232	258.63	169.315	263.287	165.479	266.027	160	268.219	154.52	269.041	148.493	268.767	142.465	267.397	136.438	222.739	169.041	228.493	172.602	234.52	175.89
123	213_frot	Fortuynia rotunda	frot	littoral	mangrove	ma	638.5	53.8	213_frot_ma	159.178	156.872	154.308	154.821	157.897	213.263	155.077	160.973	150.72	164.561	145.849	167.637	141.236	171.226	136.878	174.814	133.033	178.916	130.47	183.786	130.214	189.425	131.495	195.064	133.802	200.191	137.391	204.548	141.748	208.137	146.618	210.956	152.001	213.007	148.925	158.666	143.03	161.485	136.878	164.305
124	214_frot	Fortuynia rotunda	frot	littoral	mangrove	ma	606.6	50	214_frot_ma	217.621	106.888	211.982	110.477	259.402	143.799	219.159	112.527	219.928	117.91	219.415	123.036	218.902	128.419	219.671	133.802	220.697	138.929	222.491	144.055	225.567	148.413	229.924	151.489	234.795	153.283	240.177	153.027	245.304	151.745	250.431	149.694	254.788	146.875	213.52	116.628	212.238	122.78	211.725	128.676
125	215_frot	Fortuynia rotunda	frot	littoral	mangrove	ma	608.8	46.9	215_frot_ma	271.962	220.184	271.449	227.874	287.598	176.096	277.345	220.44	282.471	220.44	287.341	219.928	292.212	218.133	296.826	215.826	300.67	213.007	304.003	209.162	305.797	204.548	305.541	199.678	304.772	194.551	302.721	190.194	299.645	186.093	296.569	181.991	292.468	179.172	278.114	228.13	284.266	227.874	290.674	227.105
126	240_hant	Hydrozetes Antalya	hant	aquatic	aquatic	aq	492	21.7	240_hant_aq	197.813	134.648	194.174	138.027	220.167	136.987	199.113	136.467	200.412	138.807	201.192	141.146	202.232	143.486	203.531	145.565	205.351	147.125	207.69	148.685	210.03	149.204	212.369	148.944	214.709	147.645	216.528	146.085	218.088	144.006	218.608	141.666	219.388	139.067	196.253	140.107	196.773	143.226	197.813	146.345
127	242_hant	Hydrozetes Antalya	hant	aquatic	aquatic	aq	495	24.9	242_hant_aq	209.51	139.327	206.911	143.486	233.424	147.385	211.07	141.146	211.59	144.006	212.369	146.605	213.149	149.204	214.449	151.544	215.749	154.143	217.828	155.963	220.167	157.262	222.767	157.782	225.626	157.782	228.226	156.743	230.045	154.923	231.345	152.324	232.385	149.984	207.69	146.345	208.21	149.464	208.99	152.584
128	243_hant	Hydrozetes Antalya	hant	aquatic	aquatic	aq	473	19	243_hant_aq	193.394	175.978	188.455	175.978	200.932	199.372	192.354	178.317	190.794	180.657	188.975	182.736	186.895	184.556	185.336	186.895	184.296	189.495	183.776	192.094	184.296	194.694	185.596	197.293	187.675	199.113	190.015	200.152	192.874	200.672	195.733	200.412	198.333	199.632	186.895	178.577	184.296	180.657	181.957	182.996
129	244_hant	Hydrozetes Antalya	hant	aquatic	aquatic	aq	470	21.1	244_hant_aq	184.816	143.486	186.116	147.125	209.51	136.208	187.935	143.486	190.015	144.785	192.094	145.825	194.174	147.125	196.513	148.165	198.593	149.204	200.932	149.984	203.272	150.244	205.611	149.204	207.431	147.905	208.73	145.825	209.51	143.486	209.51	141.146	209.77	138.547	188.715	147.905	191.054	149.724	193.394	151.284
130	216_hlem	Hydrozetes lemnae	hlem	aquatic	aquatic	aq	477.3	22.2	216_hlem_aq	223.516	201.729	220.697	203.779	242.997	211.982	225.054	203.523	225.311	205.573	225.567	207.88	225.823	210.187	226.08	212.494	226.592	214.801	228.13	216.339	229.924	217.621	232.231	218.39	234.538	218.646	236.589	218.133	238.64	216.852	239.921	215.058	241.459	213.263	221.209	206.342	221.209	209.162	221.466	211.725
131	217_hlem	Hydrozetes lemnae	hlem	aquatic	aquatic	aq	463.4	18.7	217_hlem_aq	204.035	170.2	202.498	166.356	193.782	184.811	201.729	169.944	199.422	169.688	197.371	169.431	195.32	169.431	193.27	169.688	191.219	170.457	189.425	171.482	187.887	173.276	187.374	175.327	187.118	177.378	187.631	179.428	188.912	181.222	190.45	182.76	191.988	184.042	199.422	165.843	196.858	165.587	194.295	165.33
132	218_hlem	Hydrozetes lemnae	hlem	aquatic	aquatic	aq	440.1	22	218_hlem_aq	234.795	131.239	232.488	133.546	254.275	145.593	236.076	133.29	236.333	135.853	236.333	138.416	236.076	140.979	236.076	143.543	236.589	145.849	237.871	148.156	239.665	149.951	241.715	151.489	244.279	152.001	246.842	152.001	248.893	150.976	250.943	149.438	252.737	147.644	233	136.365	232.231	139.441	231.719	142.517
133	219_hlem	Hydrozetes lemnae	hlem	aquatic	aquatic	aq	499.6	25.2	219_hlem_aq	230.95	199.934	227.874	203.523	246.073	225.823	231.975	202.754	231.975	205.573	231.206	208.393	229.924	210.956	228.899	213.776	228.13	216.595	228.13	219.415	228.643	222.235	230.181	224.798	232.231	226.592	235.051	227.617	237.871	227.874	240.69	227.617	243.51	226.592	228.13	206.342	226.592	208.906	224.542	211.725
134	220_hlem	Hydrozetes lemnae	hlem	aquatic	aquatic	aq	495.7	19.8	220_hlem_aq	301.696	122.78	297.851	122.011	305.284	144.568	300.414	124.831	298.62	126.369	296.569	127.907	294.519	129.445	292.981	131.239	291.699	133.29	291.186	135.853	291.443	138.16	292.212	140.467	293.493	142.517	295.288	144.312	297.594	145.337	299.901	145.849	302.465	145.593	295.031	123.036	292.468	124.831	289.905	126.625
135	221_hlem	Hydrozetes lemnae	hlem	aquatic	aquatic	aq	470.7	22.6	221_hlem_aq	198.909	101.249	194.551	99.9671	195.32	125.087	197.371	103.043	195.577	104.325	193.526	105.606	191.219	106.632	189.425	107.913	187.887	109.708	186.862	111.758	186.349	114.065	185.836	116.372	186.093	118.679	187.118	120.73	188.656	122.524	190.45	124.062	192.757	124.574	192.501	101.249	189.938	102.274	187.374	103.556
136	222_hlem	Hydrozetes lemnae	hlem	aquatic	aquatic	aq	443.1	21.5	222_hlem_aq	128.163	152.77	125.087	150.463	126.625	173.276	127.138	154.052	125.087	154.565	122.78	155.59	120.73	156.615	119.192	157.897	117.397	159.435	116.372	161.485	116.116	163.792	116.116	165.843	116.885	167.894	118.166	169.944	119.961	171.226	122.011	172.251	124.062	173.02	122.78	151.232	119.961	151.745	117.397	152.77
137	223_hlem	Hydrozetes lemnae	hlem	aquatic	aquatic	aq	495	19.3	223_hlem_aq	212.751	149.182	210.444	152.258	233.257	151.745	214.545	151.232	215.314	153.283	216.083	155.077	216.852	156.872	217.877	158.666	219.671	159.947	221.722	160.204	223.773	160.204	225.567	160.46	227.617	159.691	229.155	158.666	230.693	157.128	231.719	155.334	232.488	153.539	211.725	154.565	212.238	157.128	213.007	159.435
138	224_hlem	Hydrozetes lemnae	hlem	aquatic	aquatic	aq	448	21.6	224_hlem_aq	213.776	149.182	215.314	153.027	237.102	142.517	216.339	148.925	218.39	150.207	220.184	151.489	221.978	153.283	223.773	154.565	225.823	155.59	228.13	155.846	230.437	155.334	232.488	154.308	234.282	152.77	235.82	150.976	237.358	149.182	237.871	147.131	238.127	144.824	217.364	154.821	219.159	156.615	221.209	158.409
139	225_hlem	Hydrozetes lemnae	hlem	aquatic	aquatic	aq	508	24.2	225_hlem_aq	216.595	156.872	211.725	156.615	214.032	183.786	215.058	159.178	213.52	160.973	211.469	162.511	209.162	163.792	206.855	165.33	205.317	167.381	203.779	169.431	203.01	171.995	202.754	174.558	203.267	177.121	204.548	179.172	206.342	181.222	208.649	182.248	211.213	183.017	209.675	158.922	206.855	159.947	204.292	161.485
140	226_hlem	Hydrozetes lemnae	hlem	aquatic	aquatic	aq	458.4	21.7	226_hlem_aq	176.096	175.84	172.251	177.89	189.169	193.013	176.096	178.403	175.84	180.71	175.327	182.76	174.558	185.067	174.045	187.374	173.533	189.681	174.045	191.732	175.071	193.782	176.609	195.577	178.659	196.602	180.71	197.115	183.017	197.115	185.067	196.089	187.118	195.064	171.738	180.454	170.457	182.76	169.688	185.324
141	227_hlem	Hydrozetes lemnae	hlem	aquatic	aquatic	aq	475.9	20.9	227_hlem_aq	145.081	162.767	141.748	163.023	157.384	184.555	145.849	165.587	145.081	167.894	144.055	170.2	143.03	172.251	142.261	174.558	141.748	176.865	142.005	179.428	142.774	181.735	144.055	183.786	146.106	185.324	148.156	186.349	150.72	186.605	153.027	186.349	155.59	185.58	142.005	165.587	140.467	168.15	138.672	170.713
142	061_lbon	Litoribates bonairensis	lbon	littoral	mangrove	ma	341	33.6705	061_lbon_ma	292.546	191.612	289.307	191.072	275.543	220.489	290.387	193.501	287.418	194.581	284.719	195.12	282.02	195.93	279.052	196.74	276.353	197.549	274.194	199.168	272.035	201.327	271.225	204.026	270.956	206.725	270.956	209.694	271.225	212.662	272.575	215.091	274.464	217.25	285.799	191.072	282.83	191.882	279.592	192.422
143	063_lbon	Litoribates bonairensis	lbon	littoral	mangrove	ma	364	35.5206	063_lbon_ma	285.28	226.015	282.586	224.399	269.117	257.533	282.855	228.709	279.892	229.786	276.659	230.056	273.157	230.594	269.925	231.133	266.962	232.211	264.537	234.635	262.921	237.598	261.843	240.562	261.304	244.064	261.843	247.296	262.921	250.26	264.806	252.953	266.962	255.378	279.353	226.015	275.851	226.015	272.08	226.284
144	065_lbon	Litoribates bonairensis	lbon	littoral	mangrove	ma	326	32.1905	065_lbon_ma	237.329	262.921	234.096	262.382	244.602	294.17	236.521	266.423	234.366	268.578	232.211	270.733	230.056	273.157	228.17	275.582	227.092	278.276	226.554	281.508	227.092	284.472	228.439	287.435	230.325	289.859	232.75	291.745	235.443	293.361	238.407	294.17	241.37	294.439	232.211	265.076	229.517	267.231	226.823	269.925
145	066_lbon	Litoribates bonairensis	lbon	littoral	mangrove	ma	364	35.5206	066_lbon_ma	245.141	193.689	244.602	190.725	214.701	208.505	242.178	193.958	239.215	193.15	236.521	192.072	233.558	191.264	230.864	189.917	228.17	189.109	224.937	189.109	222.243	189.648	219.55	191.264	217.933	193.689	216.317	196.382	215.239	199.076	214.701	202.04	214.701	205.003	240.831	189.378	237.868	187.762	234.905	186.146
146	067_lbon	Litoribates bonairensis	lbon	littoral	mangrove	ma	366	35.1506	067_lbon_ma	277.163	147.082	276.083	151.131	307.659	164.624	279.322	149.781	280.671	152.75	281.211	155.718	281.751	158.957	282.56	162.195	283.37	165.164	284.719	168.133	287.418	170.292	290.387	171.371	293.625	171.911	296.594	171.641	299.832	170.562	302.531	168.942	304.96	166.783	276.623	154.909	276.893	158.417	276.893	161.926
147	068_lbon	Litoribates bonairensis	lbon	littoral	mangrove	ma	349	35.5206	068_lbon_ma	208.235	174.293	205.542	176.717	236.252	195.844	210.39	177.795	210.66	181.027	210.66	184.26	210.66	187.493	210.66	190.725	210.66	193.958	212.276	196.921	214.701	199.076	217.664	200.423	220.897	200.962	224.129	201.231	227.362	200.962	230.325	199.615	233.019	197.729	206.619	179.95	206.619	183.721	206.619	187.223
148	069_lbon	Litoribates bonairensis	lbon	littoral	mangrove	ma	359	29.9705	069_lbon_ma	199.978	165.164	200.518	160.576	172.991	176.769	197.009	164.354	194.85	162.465	192.422	160.576	190.263	158.957	187.564	157.608	184.595	157.338	181.896	157.608	179.198	158.687	177.039	160.576	174.88	162.735	173.26	165.164	172.721	167.863	172.451	170.832	172.451	173.8	197.279	158.687	194.85	156.528	192.152	154.639
149	070_lbon	Litoribates bonairensis	lbon	littoral	mangrove	ma	356	35.1506	070_lbon_ma	182.105	165.134	179.95	160.554	149.509	177.795	178.872	164.864	175.909	164.056	172.946	162.44	170.252	160.823	167.289	159.477	164.325	158.668	161.093	158.399	158.13	158.399	155.436	160.285	152.742	162.44	151.126	164.864	149.779	167.827	148.97	171.06	148.97	174.023	176.987	160.554	174.023	158.668	171.06	157.052
150	071_lbon	Litoribates bonairensis	lbon	littoral	mangrove	ma	341	33.6705	071_lbon_ma	234.096	149.24	234.635	153.55	266.153	145.738	237.06	150.048	239.215	151.664	241.1	153.819	243.256	155.705	245.411	157.591	248.105	158.938	250.798	159.746	253.762	160.015	256.455	159.207	258.88	157.591	261.035	155.705	263.19	153.819	264.537	151.126	264.806	148.162	237.598	155.166	239.754	157.591	241.639	160.015
151	072_lbon	Litoribates bonairensis	lbon	littoral	mangrove	ma	347	33.6705	072_lbon_ma	146.007	150.048	146.277	154.897	177.795	141.158	149.509	151.395	151.664	153.55	154.089	155.436	156.783	157.052	159.477	158.668	162.44	159.477	165.672	159.746	168.636	158.938	171.06	157.052	173.485	155.166	175.64	153.011	176.987	150.048	177.795	147.085	178.064	144.122	150.048	156.783	152.472	158.938	155.166	161.093
152	097_lbon	Litoribates bonairensis	lbon	littoral	mangrove	ma	342	32.1905	097_lbon_ma	241.37	165.942	242.717	169.444	270.194	152.472	244.602	166.211	247.296	167.289	249.721	168.905	252.415	170.252	255.109	171.599	258.072	172.407	260.766	172.407	263.729	171.329	265.884	169.713	268.039	167.289	269.655	164.864	270.194	161.901	270.194	158.938	270.464	155.974	246.219	170.791	248.913	172.676	251.607	174.293
153	098_lbon	Litoribates bonairensis	lbon	littoral	mangrove	ma	344	33.3005	098_lbon_ma	262.589	159.497	258.541	162.195	280.941	187.834	263.129	162.735	262.589	165.974	261.78	168.942	261.24	171.911	260.43	174.88	259.891	177.848	260.43	181.087	261.51	183.786	263.669	185.945	266.098	187.834	269.066	188.913	272.035	189.453	275.004	189.183	277.972	188.643	258.271	165.704	257.462	168.942	256.382	172.181
154	099_lbon	Litoribates bonairensis	lbon	littoral	mangrove	ma	344	33.3005	099_lbon_ma	198.807	192.072	197.46	189.378	176.448	215.778	196.113	192.611	192.88	192.342	189.917	192.072	186.684	192.072	183.721	192.072	180.758	192.611	178.334	194.497	175.909	196.652	174.293	199.076	173.215	202.04	172.407	204.733	172.676	207.966	173.485	210.929	174.832	213.623	194.227	189.109	190.995	188.301	187.493	187.762
155	100_lbon	Litoribates bonairensis	lbon	littoral	mangrove	ma	374	29.9705	100_lbon_ma	153.02	150.321	150.591	153.29	179.468	164.624	154.909	152.75	155.179	155.718	155.718	158.687	156.258	161.386	156.798	164.354	157.608	167.323	159.227	169.752	161.656	171.101	164.624	171.911	167.593	171.911	170.292	171.371	173.26	170.562	175.689	169.212	177.578	167.053	151.131	156.528	151.4	160.036	151.67	163.275
156	101_lbon	Litoribates bonairensis	lbon	littoral	mangrove	ma	342	29.6005	101_lbon_ma	239.484	145.738	236.521	143.313	237.329	174.832	236.79	146.815	234.366	148.162	231.672	149.509	229.247	151.126	227.092	153.011	225.476	155.436	224.399	158.13	224.129	161.093	224.668	163.787	225.745	166.481	227.362	168.905	229.247	171.06	231.941	172.138	234.635	173.485	233.288	144.391	230.325	145.738	227.362	147.354
157	102_lbon	Litoribates bonairensis	lbon	littoral	mangrove	ma	349	34.7805	102_lbon_ma	189.917	175.37	190.456	179.95	224.399	171.599	192.611	176.987	195.035	179.142	197.46	181.566	199.615	183.721	202.04	185.876	205.003	187.493	208.235	188.301	211.468	188.031	214.431	186.954	217.395	185.338	219.819	183.452	221.974	181.027	223.321	178.064	223.86	174.832	193.15	182.644	195.305	185.338	197.729	187.762
158	103_lbon	Litoribates bonairensis	lbon	littoral	mangrove	ma	344	34.0405	103_lbon_ma	255.647	177.795	253.223	174.293	238.945	207.158	252.684	179.411	249.721	180.489	246.488	180.758	243.525	181.027	240.292	181.566	237.598	183.182	234.905	185.068	233.019	187.493	231.941	190.456	231.403	193.689	231.403	196.652	232.48	199.615	234.366	202.309	236.521	204.733	250.529	176.448	246.758	176.717	243.256	176.987
159	104_lbon	Litoribates bonairensis	lbon	littoral	mangrove	ma	337	34.4105	104_lbon_ma	161.093	123.918	158.13	128.767	185.338	148.701	163.517	126.611	164.056	129.844	163.787	133.346	163.248	136.579	163.248	139.811	163.248	143.044	163.248	146.546	164.864	149.24	167.289	151.395	170.521	152.742	173.754	153.281	176.987	153.011	179.95	151.934	182.913	150.317	159.477	131.999	158.938	135.501	158.668	139.003
160	159_lcae	Litoribates caelestis	lcae	littoral	mangrove	ma	308	27.4	159_lcae_ma	209.863	146.575	206.575	149.041	227.123	168.219	210.137	149.041	210.41	151.78	210.41	154.52	210.137	157.26	209.863	160	209.315	162.465	210.137	165.205	211.232	167.671	212.602	170.137	214.794	171.506	217.534	172.054	220.273	172.054	222.739	170.959	224.931	169.589	206.575	151.78	206.301	154.794	205.753	158.082
161	160_lcae	Litoribates caelestis	lcae	littoral	mangrove	ma	325	29	160_lcae_ma	226.849	176.438	223.013	176.438	220.821	203.561	224.931	178.63	223.013	180.822	220.547	182.465	218.082	183.561	215.616	184.931	213.424	186.849	211.506	188.767	209.863	190.958	209.041	193.698	209.315	196.438	210.41	198.904	212.328	201.095	214.794	202.465	217.534	203.013	220.273	178.356	217.534	179.452	214.794	181.095
162	161_lcae	Litoribates caelestis	lcae	littoral	mangrove	ma	312	25	161_lcae_ma	213.424	133.15	210.684	135.342	230.958	152.054	213.972	135.89	213.972	138.356	213.698	141.096	213.424	143.561	213.15	146.027	213.15	148.493	213.698	150.959	214.52	153.424	216.164	155.068	218.63	155.616	221.095	155.89	223.561	155.616	226.027	154.52	228.219	153.698	210.41	138.63	209.863	141.37	209.589	144.383
163	162_lcae	Litoribates caelestis	lcae	littoral	mangrove	ma	295	29.6	162_lcae_ma	280.273	164.383	277.26	166.575	290.136	191.78	280.547	167.397	280.273	169.589	279.451	171.78	278.63	173.972	277.808	176.438	277.26	178.63	276.986	181.095	277.26	183.287	277.808	185.479	279.177	187.397	280.821	189.315	283.013	190.137	285.205	190.685	287.397	191.506	277.808	169.041	276.438	171.232	275.342	173.698
164	163_lcae	Litoribates caelestis	lcae	littoral	mangrove	ma	315	28.9	163_lcae_ma	185.753	158.63	187.397	161.643	210.684	144.931	188.767	158.356	191.506	158.63	193.972	159.452	196.712	160.274	199.452	161.096	201.917	161.917	204.657	162.191	207.397	161.917	209.863	160.548	211.506	158.356	212.328	155.89	212.876	153.15	212.602	150.411	211.78	147.671	190.411	161.643	193.424	163.013	196.438	164.109
165	164_lcae	Litoribates caelestis	lcae	littoral	mangrove	ma	n.a.	32.4	164_lcae_ma	194.275	114.44	192.096	112.533	173.567	137.328	191.823	116.075	189.371	117.165	186.374	117.165	183.376	117.165	180.379	117.165	177.382	117.165	174.657	117.165	171.932	118.527	170.025	120.707	168.935	123.432	168.935	126.156	169.208	129.154	170.297	131.878	171.932	134.331	189.098	113.622	185.829	113.078	182.559	112.805
166	165_lcae	Litoribates caelestis	lcae	littoral	mangrove	ma	314	28.5	165_lcae_ma	230.242	144.685	226.428	143.322	220.161	170.842	227.517	146.32	224.793	147.137	222.068	147.682	219.343	148.772	216.891	149.862	214.439	151.497	212.531	153.404	210.624	155.856	209.807	158.309	209.807	161.306	210.896	164.031	212.531	166.21	214.439	168.39	216.891	169.48	224.248	144.685	220.978	145.23	217.981	146.047
167	166_lcae	Litoribates caelestis	lcae	littoral	mangrove	ma	324	31	166_lcae_ma	222.885	160.488	218.526	160.488	213.076	189.371	221.251	162.941	219.071	164.576	216.891	166.483	214.439	167.573	211.986	168.663	209.807	170.297	207.354	171.932	205.447	173.567	204.357	176.292	204.357	179.017	204.902	181.741	206.264	184.194	208.172	186.101	210.351	187.736	217.436	162.668	214.439	163.758	211.441	164.576
168	167_lcae	Litoribates caelestis	lcae	littoral	mangrove	ma	317	28.4	167_lcae_ma	185.284	205.719	180.924	205.719	187.736	233.784	183.921	208.172	182.559	210.624	180.379	212.531	178.199	214.439	176.019	216.346	174.657	218.798	173.295	221.251	172.75	223.975	173.022	226.7	174.385	229.152	176.564	230.787	179.289	231.877	181.741	232.695	184.739	233.239	180.107	208.444	177.654	210.624	175.202	212.531
169	168_lcae	Litoribates caelestis	lcae	littoral	mangrove	ma	307	32.1	168_lcae_ma	159.671	211.714	155.584	210.624	151.224	241.959	158.581	214.984	156.674	216.891	154.221	218.526	151.769	219.888	149.317	221.251	147.137	222.613	145.23	224.793	143.322	226.973	142.232	229.425	141.96	232.15	142.505	234.874	144.412	237.054	146.32	238.689	148.772	240.324	155.039	213.621	152.859	215.529	150.134	216.891
170	179_lflo	Litoribates floridae	lflo	littoral	mangrove	ma	365.2	32	179_lflo_ma	211.469	163.536	207.624	161.485	198.909	194.039	208.906	165.074	206.086	166.356	203.267	167.381	200.191	167.894	197.115	168.663	194.551	170.2	192.757	172.764	191.732	175.583	190.707	178.403	190.707	181.479	191.219	184.555	192.501	187.374	194.295	189.681	196.602	191.732	204.804	163.023	201.472	163.28	198.14	164.305
171	180_lflo	Litoribates floridae	lflo	littoral	mangrove	ma	353.5	27.9	180_lflo_ma	204.804	144.824	202.754	146.106	226.592	169.944	206.342	147.9	206.599	150.976	205.83	154.052	205.061	156.872	204.548	159.947	204.548	163.023	205.061	166.099	206.599	168.663	208.906	170.713	211.725	171.995	214.545	172.764	217.621	173.02	220.697	172.507	223.516	171.226	202.498	149.694	201.985	153.027	200.96	156.359
172	181_lflo	Litoribates floridae	lflo	littoral	mangrove	ma	365	31.9965	181_lflo_ma	224.798	145.849	221.722	145.081	210.444	176.865	222.747	148.413	219.928	149.438	216.852	149.951	213.776	150.72	210.7	151.745	207.88	153.283	205.317	155.077	203.523	157.64	202.498	160.716	201.985	164.049	202.241	167.125	203.267	170.2	205.061	172.764	207.624	174.814	218.39	146.362	215.058	147.387	211.725	147.644
173	182_lflo	Litoribates floridae	lflo	littoral	mangrove	ma	337.5	29.4	182_lflo_ma	210.187	156.103	207.88	154.052	182.248	173.789	206.855	157.128	203.523	156.872	200.447	156.103	197.627	154.821	194.551	153.796	191.476	153.027	188.143	153.027	185.324	153.796	183.017	155.846	181.222	158.666	179.941	161.485	179.172	164.561	179.428	167.637	180.454	170.713	204.292	153.539	201.216	152.001	197.884	150.72
174	183_lflo	Litoribates floridae	lflo	littoral	mangrove	ma	378.5	30.84	183_lflo_ma	138.672	194.551	135.596	192.757	109.451	216.339	136.109	196.602	132.777	196.858	129.701	196.089	126.625	195.577	123.293	194.808	120.217	194.295	116.885	194.808	114.065	196.089	111.502	198.14	109.451	200.447	108.426	203.523	107.657	206.599	107.913	209.931	108.682	213.007	132.008	192.501	128.676	191.988	125.087	191.219
175	184_lflo	Litoribates floridae	lflo	littoral	mangrove	ma	378.3	32.125	184_lflo_ma	210.187	214.032	208.393	217.108	241.459	221.722	212.494	216.595	213.52	219.415	214.545	222.491	215.826	225.311	217.364	228.13	219.415	230.437	221.722	232.488	224.542	233.257	227.874	233.513	230.693	232.744	233.513	231.462	236.076	229.668	238.383	227.874	239.921	225.054	209.675	220.184	210.444	223.516	211.725	227.105
176	185_lflo	Litoribates floridae	lflo	littoral	mangrove	ma	366.4	30.1	185_lflo_ma	220.44	105.863	219.159	109.451	249.405	118.423	223.004	108.17	223.773	110.733	224.542	113.552	225.054	116.372	225.823	119.192	227.361	121.499	229.412	123.549	231.975	124.574	234.538	125.343	237.614	125.343	240.434	125.087	242.997	124.062	245.304	122.524	247.355	120.73	220.697	112.527	221.209	115.603	221.722	118.679
177	169_tbal	Thalassozetes balboa	tbal	littoral	rock	ro	301	25.1	169_tbal_ro	229.425	167.845	226.428	168.39	237.872	191.278	229.425	170.297	228.88	173.022	227.517	174.93	225.61	176.837	223.975	178.744	223.158	180.924	222.885	183.649	223.43	186.101	224.248	188.553	225.61	190.461	227.79	191.823	230.242	192.913	232.695	192.913	235.147	192.368	225.61	171.387	223.43	173.295	221.523	175.747
178	170_tbal	Thalassozetes balboa	tbal	littoral	rock	ro	302	28.4	170_tbal_ro	184.739	193.185	186.101	196.183	210.079	180.379	188.008	192.641	190.733	193.458	193.185	194.82	195.91	195.91	198.635	196.728	201.36	197	204.357	197	206.809	195.91	209.534	194.82	211.714	193.185	212.804	191.006	213.621	187.736	213.621	184.739	211.986	182.559	189.371	197	191.823	198.907	195.093	200.27
179	171_tbal	Thalassozetes balboa	tbal	littoral	rock	ro	310	28.2	171_tbal_ro	172.75	188.553	168.39	188.553	179.834	216.346	172.205	191.006	170.57	193.185	168.935	195.365	166.755	197.273	165.393	199.725	164.576	202.45	164.303	205.174	164.303	207.899	164.848	210.624	166.483	213.076	168.663	214.711	171.115	216.073	174.112	216.346	176.837	216.346	167.573	191.551	164.848	193.458	162.941	195.91
180	172_tbal	Thalassozetes balboa	tbal	littoral	rock	ro	314	29.6	172_tbal_ro	168.118	154.221	165.665	151.224	142.232	165.938	165.665	154.766	162.941	153.949	160.216	152.859	157.764	151.769	155.039	150.679	152.314	149.589	149.589	149.317	146.865	149.862	144.14	150.952	141.688	152.314	140.053	154.766	139.508	157.491	139.78	160.216	140.325	162.941	162.941	149.589	160.216	147.682	157.491	146.047
181	173_tbal	Thalassozetes balboa	tbal	littoral	rock	ro	n.a.	28	173_tbal_ro	148.499	252.858	144.957	252.585	145.23	280.65	147.41	255.582	144.957	256.4	142.505	257.762	140.053	259.125	137.873	260.76	136.51	263.212	135.148	265.664	134.331	268.116	134.058	271.114	134.058	273.838	135.148	276.291	136.783	278.47	139.235	279.833	141.96	280.378	142.232	254.22	139.235	255.038	136.238	256.672
182	174_tbal	Thalassozetes balboa	tbal	littoral	rock	ro	278	26.7	174_tbal_ro	255.31	253.948	255.038	250.678	228.88	255.038	253.13	253.675	250.95	252.04	249.043	249.86	247.408	247.681	245.501	245.501	243.321	243.866	240.596	243.049	237.872	242.231	235.147	241.959	232.422	243.049	229.97	244.411	228.335	246.591	227.517	249.316	227.79	252.04	252.858	247.953	251.223	245.228	249.316	243.049
183	175_tbal	Thalassozetes balboa	tbal	littoral	rock	ro	n.a.	25.8	175_tbal_ro	257.762	138.145	253.948	138.145	265.392	162.668	257.49	140.598	255.582	142.777	253.675	145.23	252.04	147.41	250.405	149.862	249.588	152.587	249.316	155.584	249.588	158.309	250.405	161.033	251.768	163.758	253.948	165.393	256.945	165.665	259.67	165.12	262.394	164.303	253.13	140.87	250.405	143.05	247.953	145.502
184	176_tbal	Thalassozetes balboa	tbal	littoral	rock	ro	291	28.9	176_tbal_ro	99.4537	264.847	96.729	262.939	75.7483	279.56	96.729	265.119	94.2767	264.574	91.5519	263.757	89.0997	263.212	86.3749	262.667	83.6501	262.394	80.9254	262.939	78.4731	263.484	76.0208	264.847	74.6584	267.026	73.296	269.479	72.7511	271.931	73.0236	274.656	74.1135	277.108	93.7317	261.304	91.007	259.942	88.2822	258.852
185	177_tbal	Thalassozetes balboa	tbal	littoral	rock	ro	320	27.1	177_tbal_ro	295.364	264.574	292.639	267.026	312.53	286.1	296.181	267.299	295.636	269.751	295.092	272.476	294.547	274.928	294.547	277.653	294.819	280.378	295.364	283.103	296.454	285.282	298.361	287.462	300.541	288.825	302.993	289.914	305.718	290.187	308.17	289.642	310.35	288.007	291.549	269.751	290.732	273.021	290.187	276.291
186	178_tbal	Thalassozetes balboa	tbal	littoral	rock	ro	285	29.9	178_tbal_ro	274.383	248.771	273.293	251.768	298.906	264.574	276.563	250.95	277.381	253.403	277.653	256.127	277.926	259.125	278.47	261.849	279.015	264.574	280.65	267.026	282.83	268.661	285.01	270.296	287.735	271.114	290.459	271.386	293.184	270.841	295.636	269.479	297.271	267.026	273.838	254.765	273.838	258.035	274.383	261.032
187	049_tgre	Thalassozetes grenada	tgre	littoral	rock	ro	290	22.5704	049_tgre_ro	254.57	111.795	249.99	112.334	273.966	123.648	254.839	113.681	255.109	116.105	255.378	118.26	255.378	120.685	256.186	122.84	257.533	124.456	258.611	126.342	260.496	127.689	262.651	128.228	264.806	128.767	267.231	129.036	269.386	128.767	271.002	127.42	272.619	125.534	250.529	115.028	250.529	117.991	251.068	120.954
188	050_tgre	Thalassozetes grenada	tgre	littoral	rock	ro	289	27.0104	050_tgre_ro	150.074	206.999	148.985	204.548	123.927	213.263	147.078	206.727	144.627	205.909	142.72	204.275	140.814	202.641	138.635	201.007	136.184	199.645	133.732	199.1	131.009	199.645	128.557	200.462	126.378	201.824	124.199	203.458	123.11	205.637	122.02	208.088	122.565	210.812	146.806	201.552	144.627	199.373	142.176	197.738
189	051_tgre	Thalassozetes grenada	tgre	littoral	rock	ro	271	28.8605	051_tgre_ro	54.4734	225.52	52.5668	223.069	29.688	240.228	51.4774	225.792	49.0261	224.703	46.3024	223.613	43.3064	222.796	40.5827	222.251	37.859	222.524	34.863	223.069	32.1393	224.158	29.9604	225.792	27.7814	227.699	25.8749	230.15	25.6025	232.874	26.1472	235.87	27.7814	238.049	49.5708	220.89	46.5748	219.255	43.5787	218.166
190	053_tgre	Thalassozetes grenada	tgre	littoral	rock	ro	283	24.0504	053_tgre_ro	303.417	191.746	300.421	193.381	310.771	214.353	303.417	194.742	302.327	196.921	300.966	198.828	299.604	200.734	298.514	202.913	297.969	205.365	297.697	207.544	297.697	209.995	298.514	212.174	299.876	214.353	301.783	215.715	303.962	216.259	306.413	216.259	308.864	215.715	298.242	195.287	296.335	197.466	294.701	199.645
191	054_tgre	Thalassozetes grenada	tgre	littoral	rock	ro	282	26.6404	054_tgre_ro	355.966	154.639	357.316	157.608	380.525	143.574	358.935	154.909	361.364	155.988	363.523	157.608	365.952	158.687	368.651	159.227	371.079	159.497	373.778	159.227	376.477	158.687	378.636	157.338	380.525	155.449	382.144	153.559	382.684	150.861	382.684	148.162	381.605	145.733	360.015	159.497	362.443	161.116	364.872	163.005
192	057_tgre	Thalassozetes grenada	tgre	littoral	rock	ro	271	24.2354	057_tgre_ro	213.623	218.203	215.509	216.586	190.187	219.819	212.007	215.509	210.66	213.892	208.774	212.007	206.888	210.66	205.003	209.313	202.848	207.966	200.423	207.427	197.999	207.158	195.844	207.697	193.689	208.774	191.803	210.121	190.456	212.276	189.917	214.431	189.917	216.856	214.162	213.892	212.546	210.929	210.66	208.505
193	062_tgre	Thalassozetes grenada	tgre	littoral	rock	ro	261	25.5304	062_tgre_ro	329.292	207.544	329.564	210.54	354.349	204.548	332.288	208.088	334.194	209.995	336.101	211.902	338.007	213.808	339.914	215.442	342.093	216.532	344.817	217.349	347.268	217.621	349.992	217.349	352.171	216.259	354.077	214.353	355.439	212.174	355.984	209.723	355.711	206.999	331.743	212.991	333.65	215.442	335.829	217.621
194	064_tgre	Thalassozetes grenada	tgre	littoral	rock	ro	292	26.2704	064_tgre_ro	85.2509	272.639	82.2548	272.367	74.9009	296.335	83.6167	274.274	81.1654	274.818	78.4417	275.363	75.9904	276.18	73.5391	277.27	71.3602	278.904	69.4536	280.81	68.0918	282.989	66.7299	285.441	66.1852	287.892	66.4575	290.616	67.547	293.067	69.4536	294.973	71.9049	295.518	78.7141	271.822	75.718	272.095	72.722	272.912
195	199_tfal	Thasecazetes falcidactylus	tfal	littoral	mangrove	ma	378.2	30.1	199_tfal_ma	209.931	156.359	208.393	154.308	184.811	178.403	207.111	157.384	204.035	156.872	200.703	156.359	197.627	155.846	194.295	155.59	191.219	156.359	188.4	157.384	185.58	159.178	183.529	161.485	181.735	164.049	180.71	167.125	180.71	170.457	181.479	173.533	183.017	176.096	204.804	153.796	201.472	152.258	198.14	151.745
196	200_tfal	Thasecazetes falcidactylus	tfal	littoral	mangrove	ma	380.2	29.2	200_tfal_ma	184.042	178.916	183.017	175.327	150.207	184.298	180.966	178.916	178.403	177.634	175.583	176.096	173.533	174.045	170.969	172.251	167.894	171.226	165.074	170.713	161.998	170.713	158.922	170.713	156.103	171.738	153.539	173.533	151.489	175.583	149.951	178.147	149.438	181.222	180.454	174.302	178.147	171.995	175.327	169.944
197	201_tfal	Thasecazetes falcidactylus	tfal	littoral	mangrove	ma	385.3	26.6	201_tfal_ma	171.482	29.2212	166.099	29.9901	165.843	61.2619	170.457	31.7844	168.406	33.835	165.843	35.373	163.536	37.1673	161.229	39.2179	159.178	41.2685	157.897	43.8317	156.615	46.395	156.103	49.2146	155.846	52.2905	156.359	55.1101	157.897	57.6733	159.691	59.724	162.511	60.7493	164.561	32.0408	161.742	33.0661	159.178	34.8603
198	124_utha	Thasecazetes sp.	utha	littoral	mangrove	ma	388	43.2907	124_utha_ma	134.592	112.431	131.349	112.431	143.241	154.592	133.782	115.944	131.349	118.917	128.376	121.349	126.214	124.593	124.593	127.836	124.052	131.62	124.052	135.403	124.593	139.187	125.403	142.971	126.755	146.484	129.187	149.457	132.16	151.889	135.403	153.241	139.187	154.592	129.187	115.944	125.944	118.106	123.241	121.62
199	125_utha	Thasecazetes sp.	utha	littoral	mangrove	ma	417	28.8645	125_utha_ma	206.753	169.727	207.835	172.97	244.591	149.457	211.078	170.268	214.591	171.349	217.834	172.97	221.078	174.592	224.861	174.862	228.375	174.051	231.888	172.97	235.402	171.349	238.375	169.187	241.077	166.754	243.78	164.051	245.402	160.808	245.672	157.025	245.402	153.241	211.618	173.781	214.861	176.754	218.645	178.376
200	126_utha	Thasecazetes sp.	utha	littoral	mangrove	ma	400	39.2206	126_utha_ma	176.754	160.808	172.97	162.16	203.781	190.267	177.024	164.322	176.213	167.565	175.673	171.078	175.403	174.592	176.213	177.835	177.565	181.078	179.186	184.051	181.619	186.484	184.592	188.375	187.294	190.538	190.538	191.619	194.051	192.429	197.564	192.429	200.808	191.348	173.781	165.943	172.43	169.457	171.619	173.241
201	127_utha	Thasecazetes sp.	utha	littoral	mangrove	ma	385	39.5906	127_utha_ma	191.078	190.538	188.916	187.294	163.511	218.375	187.565	191.348	184.051	191.078	180.538	190.267	177.024	189.456	173.511	190.267	170.268	191.348	167.295	193.51	164.592	195.673	162.7	198.646	161.079	201.889	159.457	205.132	159.187	208.645	159.457	212.159	161.079	215.132	185.402	187.565	181.619	185.943	177.835	184.862
202	128_utha	Thasecazetes sp.	utha	littoral	mangrove	ma	370	42.9207	128_utha_ma	174.862	154.862	173.781	158.106	215.132	169.997	177.835	157.565	179.186	161.079	180.267	164.592	181.348	168.105	183.24	171.078	185.943	173.781	189.186	175.673	192.429	177.294	195.943	178.105	199.456	178.376	203.24	177.835	206.753	176.754	209.997	175.132	212.699	172.7	175.403	161.889	175.943	165.943	177.024	169.727
[truncated: 22 more columns]

## Sheet: Tabelle2
n
9		n these TPS files, semilandmark curves have already been appended to landmarks and the resulting overlapping landmarks have already been deleted.
25
12
11
10
7
7
23
8
13
4
12
18
10
7
10
3
8
5
202
